# Supplementary material for: Active management is required to turn the tide for depleted Ostrea edulis stocks from the effects of overfishing, disease and invasive species
Source: PeerJ. 2019 Feb 28;7:e6431. doi: 10.7717/peerj.6431 (PMC6397756; doi:10.7717/peerj.6431)
Supplement: Supplemental Information 1 [file peerj-07-6431-s001.xlsx]

## Sheet: Morphometric data
Number	Harbour	Year	Weight (g)	Max Length (mm)	Max Width (mm)	Max Depth (mm)
1	Portsmouth	2015	233.5	103	97
2	Portsmouth	2015	163.7	86	92
3	Portsmouth	2015	129.5	81	81
4	Portsmouth	2015	141	88	86
5	Portsmouth	2015	194.8	90	108
6	Portsmouth	2015	196.7	89	97
7	Portsmouth	2015	774.7	140	117
8	Portsmouth	2015	196.4	107	86
9	Portsmouth	2015	172.3	88	86
10	Portsmouth	2015	116.7	89	73
11	Portsmouth	2015	118.6	96	94
12	Portsmouth	2015	204.4	98	92
13	Portsmouth	2015	297.1	108	113
14	Portsmouth	2015	181.8	107	92
15	Portsmouth	2015	105.9	85	76
16	Portsmouth	2015	250.4	98	92
17	Portsmouth	2015	143.2	79	73
18	Portsmouth	2015	184	86	94
19	Portsmouth	2015	137.3	80	68
20	Portsmouth	2015	204.8	93	92
21	Portsmouth	2015	187.4	84	84
22	Portsmouth	2015	115.6	80	75
23	Portsmouth	2015	156.1	90	82
24	Portsmouth	2015	81.7	74	65
25	Portsmouth	2015	154.8	88	87
26	Portsmouth	2015	223.9	103	89
27	Portsmouth	2015	127.7	85	81
28	Portsmouth	2015	128.2	80	82
29	Portsmouth	2015	209.4	97	89
30	Portsmouth	2015	71.3	68	64
31	Portsmouth	2015	161.7	93	73
32	Portsmouth	2015	167	93	92
33	Portsmouth	2015	72.3	66	61
34	Portsmouth	2015	266.5	108	100
35	Portsmouth	2015	158.5	81	82
36	Portsmouth	2015	284.7	113	107
37	Portsmouth	2015	163.6	100	86
38	Portsmouth	2015	248.5	109	97
39	Portsmouth	2015	119.8	78	74
40	Portsmouth	2015	140	86	79
41	Portsmouth	2015	90	76	70
42	Portsmouth	2015	208.4	101	96
43	Portsmouth	2015	111.9	76	70
44	Portsmouth	2015	147.7	86	77
45	Portsmouth	2015	168.9	89	71
46	Portsmouth	2015	136.2	82	79
47	Portsmouth	2015	131.2	82	82
48	Portsmouth	2015	153.7	87	82
49	Portsmouth	2015	74.9	61	62
50	Portsmouth	2015	223.8	93	84
51	Portsmouth	2015	228.2	96	100
52	Portsmouth	2015	77.5	70	66
53	Portsmouth	2015	143.5	92	91
54	Portsmouth	2015	73.1	75	72
55	Portsmouth	2015	117.6	76	75
56	Portsmouth	2015	138.6	90	67
57	Portsmouth	2015	144.5	82	79
58	Portsmouth	2015	125.1	78	82
59	Portsmouth	2015	92.2	73	72
60	Portsmouth	2015	131.9	76	75
61	Portsmouth	2015	121.3	79	80
62	Portsmouth	2015	92.4	86	83
63	Portsmouth	2015	192	89	96
64	Portsmouth	2015	145.8	88	90
65	Portsmouth	2015	105.7	80	76
66	Portsmouth	2015	102.3	77	67
67	Portsmouth	2015	116.7	86	80
68	Portsmouth	2015	128.1	84	81
69	Portsmouth	2015	123.5	82	78
70	Portsmouth	2015	130	87	62
71	Portsmouth	2015	124	81	75
72	Portsmouth	2015	131.9	85	74
73	Portsmouth	2015	198.2	92	29
74	Portsmouth	2015	163	73	83
75	Portsmouth	2015	149.3	88	78
76	Portsmouth	2015	52.9	56	42
77	Portsmouth	2015	182.6	93	91
78	Portsmouth	2015	177.6	96	83
79	Portsmouth	2015	119.4	74	78
80	Portsmouth	2015	222.6	107	106
81	Portsmouth	2015	430.9	122	122
82	Portsmouth	2015	110.7	86	78
83	Portsmouth	2015	102.6	71	64
84	Portsmouth	2015	217.7	88	92
85	Portsmouth	2015	174.9	94	81
86	Portsmouth	2015	159.4	86	86
87	Portsmouth	2015	149.3	79	82
88	Portsmouth	2015	69	71	59
89	Portsmouth	2015	102.6	78	73
90	Portsmouth	2015	75.6	71	62
91	Portsmouth	2015	272.7	103	101
92	Portsmouth	2015	112.4	81	62
93	Portsmouth	2015	141	85	84
94	Portsmouth	2015	112.5	88	72
95	Portsmouth	2015	113.3	77	72
96	Portsmouth	2015	177.6	94	90
97	Portsmouth	2015	103.1	72	71
98	Portsmouth	2015	154.8	83	86
99	Portsmouth	2015	160	96	82
100	Portsmouth	2015	107.6	76	74
101	Portsmouth	2015	167.8	95	85
102	Portsmouth	2015	131.9	79	72
103	Portsmouth	2015	124.3	83	95
104	Portsmouth	2015	127.7	83	71
105	Portsmouth	2015	105.9	77	63
106	Portsmouth	2015	126.1	81	78
107	Portsmouth	2015	95.8	78	65
108	Portsmouth	2015	228.8	103	95
109	Portsmouth	2015	217	91	87
110	Portsmouth	2015	136.3	85	73
111	Portsmouth	2015	121.6	80	78
112	Portsmouth	2015	100.2	80	65
113	Portsmouth	2015	195.2	93	92
114	Portsmouth	2015	72.9	70	66
115	Portsmouth	2015	102.6	77	64
116	Portsmouth	2015	126	79	69
117	Portsmouth	2015	146.2	82	96
118	Portsmouth	2015	121.5	82	75
119	Portsmouth	2015	240.3	104	96
120	Portsmouth	2015	173	97	85
121	Portsmouth	2015	124.5	84	74
122	Portsmouth	2015	117.6	83	75
123	Portsmouth	2015	128.7	81	79
124	Portsmouth	2015	81.7	69	59
125	Portsmouth	2015	130.7	78	61
126	Portsmouth	2015	160.7	91	81
127	Portsmouth	2015	125.9	83	61
128	Portsmouth	2015	107.5	81	74
129	Portsmouth	2015	289.5	103	106
130	Portsmouth	2015	177.5	96	81
131	Portsmouth	2015	78.8	77	72
132	Portsmouth	2015	213.3	107	71
133	Portsmouth	2015	130.1	86	80
134	Portsmouth	2015	62.4	66	72
135	Portsmouth	2015	102.5	78	74
136	Portsmouth	2015	152	79	75
137	Portsmouth	2015	161	82	83
138	Portsmouth	2015	146.6	84	80
139	Portsmouth	2015	95.5	79	74
140	Portsmouth	2015	120	86	79
141	Portsmouth	2015	133.1	83	77
142	Portsmouth	2015	145.4	82	82
143	Portsmouth	2015	128.2	66	78
144	Portsmouth	2015	142.2	83	88
145	Portsmouth	2015	103.7	80	66
146	Portsmouth	2015	94.2	81	66
147	Portsmouth	2015	121.5	84	75
148	Portsmouth	2015	154.6	89	99
149	Portsmouth	2015	161.3	91	86
150	Portsmouth	2015	117.1	90	72
151	Portsmouth	2015	94.8	82	71
152	Portsmouth	2015	151.9	87	86
153	Portsmouth	2015	108.8	77	81
154	Portsmouth	2015	86.4	66	60
155	Portsmouth	2015	162.8	89	84
156	Portsmouth	2015	70.8	72	72
157	Portsmouth	2015	118.4	87	72
158	Portsmouth	2015	179.7	108	81
159	Portsmouth	2015	40.3	64	64
160	Portsmouth	2015	109.3	76	68
161	Portsmouth	2015	109.9	73	62
162	Portsmouth	2015	125.8	68	73
163	Portsmouth	2015	121.9	81	75
164	Portsmouth	2015	103.4	78	81
165	Portsmouth	2015	127.2	90	75
166	Portsmouth	2015	59.4	71	58
167	Portsmouth	2015	150.3	80	101
168	Portsmouth	2015	227.6	96	95
169	Portsmouth	2015	79.1	71	70
170	Portsmouth	2015	156.5	95	83
171	Portsmouth	2015	213.8	98	109
172	Portsmouth	2015	156.2	86	87
173	Portsmouth	2015	76	76	65
174	Portsmouth	2015	50.2	78	65
175	Portsmouth	2015	102.4	81	70
176	Portsmouth	2015	158.1	83	71
177	Portsmouth	2015	111.8	82	77
178	Portsmouth	2015	103.2	72	71
179	Portsmouth	2015	112.4	74	69
180	Portsmouth	2015	57.2	62	53
181	Portsmouth	2015	98.1	73	68
182	Portsmouth	2015	49.5	61	62
183	Portsmouth	2015	87.3	72	63
184	Portsmouth	2015	109.5	85	72
185	Portsmouth	2015	99.1	82	78
186	Portsmouth	2015	132.5	79	82
187	Portsmouth	2015	124.2	78	79
188	Portsmouth	2015	90	76	74
189	Portsmouth	2015	61	65	59
190	Portsmouth	2015	136.5	89	83
191	Portsmouth	2015	175.9	92	99
192	Portsmouth	2015	109.8	75	69
193	Portsmouth	2015	119.2	82	92
194	Portsmouth	2015	159.4	87	65
195	Portsmouth	2015	83.2	69	63
196	Portsmouth	2015	63	70	64
197	Portsmouth	2015	77.9	76	62
198	Portsmouth	2015	81.6	70	58
199	Portsmouth	2015	194.8	89	89
200	Portsmouth	2015	147.5	88	98
201	Portsmouth	2015	201.3	95	90
202	Portsmouth	2015	165.3	87	86
203	Portsmouth	2015	218.6	101	89
204	Portsmouth	2015	236.6	115	104
205	Portsmouth	2015	169.4	100	83
206	Portsmouth	2015	169.6	89	102
207	Portsmouth	2015	93.8	79	67
208	Portsmouth	2015	263	107	105
209	Portsmouth	2015	107.1	90	86
210	Portsmouth	2015	108.1	74	90
211	Portsmouth	2015	114.8	79	78
212	Portsmouth	2015	148.4	85	81
213	Portsmouth	2015	162.3	88	75
214	Portsmouth	2015	157	83	80
215	Portsmouth	2015	278.5	107	112
216	Portsmouth	2015	133	85	80
217	Portsmouth	2015	149.3	87	82
218	Portsmouth	2015	127.2	84	74
219	Portsmouth	2015	178.7	89	93
220	Portsmouth	2015	123.1	78	63
221	Portsmouth	2015	130.6	80	75
222	Portsmouth	2015	137.5	94	80
223	Portsmouth	2015	133.5	87	72
224	Portsmouth	2015	66.7	68	66
225	Portsmouth	2015	135	89	84
226	Portsmouth	2015	174.9	96	108
227	Portsmouth	2015	135.9	83	82
228	Portsmouth	2015	105.4	88	67
229	Portsmouth	2015	124.2	80	72
230	Portsmouth	2015	94.8	76	66
231	Portsmouth	2015	169.9	92	90
232	Portsmouth	2015	150	93	98
233	Portsmouth	2015	134.3	89	95
234	Portsmouth	2015	165.5	88	86
235	Portsmouth	2015	126.3	88	87
236	Portsmouth	2015	145.1	94	95
237	Portsmouth	2015	188.7	95	89
238	Portsmouth	2015	127.1	77	65
239	Portsmouth	2015	149.3	89	80
240	Portsmouth	2015	180.4	91	90
241	Portsmouth	2015	81.5	68	75
242	Portsmouth	2015	103.1	76	66
243	Portsmouth	2015	94.4	75	60
244	Portsmouth	2015	101.2	78	69
245	Portsmouth	2015	128.2	90	74
246	Portsmouth	2015	193.6	90	85
247	Portsmouth	2015	122.1	74	77
248	Portsmouth	2015	188.8	103	90
249	Portsmouth	2015	171.6	88	70
250	Portsmouth	2015	192.8	97	100
251	Portsmouth	2015	168.8	91	89
252	Portsmouth	2015	121.1	75	66
253	Portsmouth	2015	241.9	97	109
254	Portsmouth	2015	106	82	76
255	Portsmouth	2015	95.6	81	81
256	Portsmouth	2015	154.7	96	86
257	Portsmouth	2015	82.2	71	69
258	Portsmouth	2015	60	63	61
259	Portsmouth	2015	86.9	69	70
260	Portsmouth	2015	405.9	117	107
261	Portsmouth	2015	92.1	64	74
262	Portsmouth	2015	81.8	78	61
263	Portsmouth	2015	166.1	93	92
264	Portsmouth	2015	86.2	65	59
265	Portsmouth	2015	151.8	84	87
266	Portsmouth	2015	123.2	80	83
267	Portsmouth	2015	114.1	86	75
268	Portsmouth	2015	175.1	93	81
269	Portsmouth	2015	115.7	77	70
270	Portsmouth	2015	245.6	107	94
271	Portsmouth	2015	72.8	67	63
272	Portsmouth	2015	126.6	83	74
273	Portsmouth	2015	148.4	79	76
274	Portsmouth	2015	90.7	75	71
275	Portsmouth	2015	124.8	84	73
276	Portsmouth	2015	105.5	82	71
277	Portsmouth	2015	175.9	96	90
278	Portsmouth	2015	227.9	114	101
279	Portsmouth	2015	112.3	70	79
280	Portsmouth	2015	78	68	64
281	Portsmouth	2015	116	80	80
282	Portsmouth	2015	101.2	77	100
283	Portsmouth	2015	84.1	77	72
284	Portsmouth	2015	144.9	87	81
285	Portsmouth	2015	139	86	75
286	Portsmouth	2015	232.5	99	103
287	Portsmouth	2015	142	84	73
288	Portsmouth	2015	128.1	90	85
289	Portsmouth	2015	200.9	102	92
290	Portsmouth	2015	136.3	89	83
291	Portsmouth	2015	144.2	90	94
292	Portsmouth	2015	69.2	70	78
293	Portsmouth	2015	232.9	115	88
294	Portsmouth	2015	152.2	92	84
295	Portsmouth	2015	244.1	101	102
296	Portsmouth	2015	134.5	91	83
297	Portsmouth	2015	121.2	76	68
298	Portsmouth	2015	144.4	90	73
299	Portsmouth	2015	88.4	76	72
300	Portsmouth	2015	78.9	76	61
301	Portsmouth	2015	161.2	85	78
302	Portsmouth	2015	162.8	85	75
303	Portsmouth	2015	192.6	95	95
304	Portsmouth	2015	162.7	99	95
305	Portsmouth	2015	95.3	85	65
306	Portsmouth	2015	124	82	75
307	Portsmouth	2015	147.2	94	82
308	Portsmouth	2015	115.7	79	73
309	Portsmouth	2015	173.2	89	84
310	Portsmouth	2015	162.8	87	80
311	Portsmouth	2015	78.6	69	60
312	Portsmouth	2015	157.8	94	86
313	Portsmouth	2015	173	98	81
314	Portsmouth	2015	140.4	85	87
315	Portsmouth	2015	95.2	74	68
316	Portsmouth	2015	105.3	81	71
317	Portsmouth	2015	128.9	81	75
318	Portsmouth	2015	223.2	101	88
319	Portsmouth	2015	104.7	69	61
320	Portsmouth	2015	108.1	76	89
321	Portsmouth	2015	90.3	80	79
322	Portsmouth	2015	180.1	91	81
323	Portsmouth	2015	121.2	79	76
324	Portsmouth	2015	193.7	97	108
325	Portsmouth	2015	69.4	62	56
326	Portsmouth	2015	143.7	87	87
327	Portsmouth	2015	176.3	97	88
328	Portsmouth	2015	115	79	78
329	Portsmouth	2015	131.1	85	74
330	Portsmouth	2015	95.8	76	74
331	Portsmouth	2015	119.5	84	76
332	Portsmouth	2015	118.6	78	76
333	Portsmouth	2015	83.6	68	64
334	Portsmouth	2015	142	76	65
335	Portsmouth	2015	127.5	77	70
336	Portsmouth	2015	142.4	84	85
337	Portsmouth	2015	157.3	95	89
338	Portsmouth	2015	163.9	90	88
339	Portsmouth	2015	127.3	86	73
340	Portsmouth	2015	229.6	111	98
341	Portsmouth	2015	187.3	94	90
342	Portsmouth	2015	193.6	101	110
343	Portsmouth	2015	108.8	81	80
344	Portsmouth	2015	103.3	80	77
345	Portsmouth	2015	149.2	91	86
346	Portsmouth	2015	150.3	85	87
347	Portsmouth	2015	82.9	77	70
348	Portsmouth	2015	115.6	83	71
349	Portsmouth	2015	130.7	86	75
350	Portsmouth	2015	143.3	80	86
351	Portsmouth	2015	109.6	85	75
352	Portsmouth	2015	104.1	79	69
353	Portsmouth	2015	133.9	82	76
354	Portsmouth	2015	129.9	90	87
355	Portsmouth	2015	194.3	90	100
356	Portsmouth	2015	118	77	85
357	Portsmouth	2015	90.1	72	68
358	Portsmouth	2015	121.6	87	82
359	Portsmouth	2015	177.5	93	94
360	Portsmouth	2015	84.2	78	60
361	Portsmouth	2015	89.5	67	69
362	Portsmouth	2015	108.6	81	78
363	Portsmouth	2015	184.2	97	88
364	Portsmouth	2015	92.6	76	82
365	Portsmouth	2015	96.8	76	72
366	Portsmouth	2015	106.6	76	69
367	Portsmouth	2015	131.8	92	98
368	Portsmouth	2015	109.4	77	66
369	Portsmouth	2015	84.7	73	61
370	Portsmouth	2015	165	91	87
371	Portsmouth	2015	272.3	103	99
372	Portsmouth	2015	172.1	96	85
373	Portsmouth	2015	214.3	97	107
374	Portsmouth	2015	123.5	89	75
375	Portsmouth	2015	145.4	93	78
376	Portsmouth	2015	196.8	101	89
377	Portsmouth	2015	195.2	98	99
378	Portsmouth	2015	113.5	86	78
379	Portsmouth	2015	171.2	87	86
380	Portsmouth	2015	173.8	101	94
381	Portsmouth	2015	107.4	89	80
382	Portsmouth	2015	151.4	89	96
383	Portsmouth	2015	109	77	81
384	Portsmouth	2015	167.6	88	100
385	Portsmouth	2015	220.9	95	90
386	Portsmouth	2015	137	104	86
387	Portsmouth	2015	191.6	101	92
388	Portsmouth	2015	312.9	122	129
389	Portsmouth	2015	167.6	90	84
390	Portsmouth	2015	125.2	81	86
391	Portsmouth	2015	187.4	102	80
392	Portsmouth	2015	147.1	94	85
393	Portsmouth	2015	139.9	86	91
394	Portsmouth	2015	109.1	89	81
395	Portsmouth	2015	109.6	75	68
396	Portsmouth	2015	218	103	92
397	Portsmouth	2015	171.4	94	101
398	Portsmouth	2015	86.7	75	72
399	Portsmouth	2015	125.7	81	84
400	Portsmouth	2015	324.1	114	108
401	Portsmouth	2015	139.1	98	81
402	Portsmouth	2015	141	84	76
403	Portsmouth	2015	177	91	93
404	Portsmouth	2015	129.6	81	91
405	Portsmouth	2015	153.9	100	95
406	Portsmouth	2015	138.9	84	91
407	Portsmouth	2015	157.7	95	80
408	Portsmouth	2015	212	104	91
409	Portsmouth	2015	116.7	80	73
410	Portsmouth	2015	87.7	80	70
411	Portsmouth	2015	225.8	103	96
412	Portsmouth	2015	97.7	76	69
413	Portsmouth	2015	139	87	89
414	Portsmouth	2015	159.5	94	90
415	Portsmouth	2015	100.3	80	74
416	Portsmouth	2015	281.5	115	117
417	Portsmouth	2015	87.4	72	62
418	Portsmouth	2015	153.4	88	84
419	Portsmouth	2015	123.8	84	76
420	Portsmouth	2015	178.3	85	90
421	Portsmouth	2015	111	81	72
422	Portsmouth	2015	115.3	78	65
423	Portsmouth	2015	165.7	90	101
424	Portsmouth	2015	90.8	80	81
425	Portsmouth	2015	149.6	92	85
426	Portsmouth	2015	70.9	71	76
427	Portsmouth	2015	168.1	86	78
428	Portsmouth	2015	161.1	88	89
429	Portsmouth	2015	106.3	84	82
430	Portsmouth	2015	166.4	90	84
431	Portsmouth	2015	179.9	100	95
432	Portsmouth	2015	127.8	81	73
433	Portsmouth	2015	164.1	82	89
434	Portsmouth	2015	157.6	85	100
435	Portsmouth	2015	83.1	71	70
436	Portsmouth	2015	157.5	86	86
437	Portsmouth	2015	80	74	84
438	Portsmouth	2015	77.4	64	61
439	Portsmouth	2015	140.2	89	90
440	Portsmouth	2015	126.3	89	85
441	Portsmouth	2015	166.2	102	94
442	Portsmouth	2015	121.8	82	78
443	Portsmouth	2015	145.5	94	82
444	Portsmouth	2015	118.6	74	71
445	Portsmouth	2015	105.2	78	78
446	Portsmouth	2015	202.5	104	90
447	Portsmouth	2015	127.4	88	80
448	Portsmouth	2015	116.9	80	74
449	Portsmouth	2015	112.9	93	73
450	Portsmouth	2015	108.4	81	83
451	Portsmouth	2015	114.6	83	83
452	Portsmouth	2015	181.4	91	88
453	Portsmouth	2015	140.3	81	75
454	Portsmouth	2015	145.7	79	74
455	Portsmouth	2015	177.9	91	104
456	Portsmouth	2015	185.4	94	89
457	Portsmouth	2015	67.5	68	73
458	Portsmouth	2015	162.1	93	92
459	Portsmouth	2015	113.6	84	85
460	Portsmouth	2015	114.3	79	81
461	Portsmouth	2015	139	90	92
462	Portsmouth	2015	103	87	78
463	Portsmouth	2015	235.9	98	77
464	Portsmouth	2015	163.7	86	80
465	Portsmouth	2015	91	74	70
466	Portsmouth	2015	102.5	79	80
467	Portsmouth	2015	138.4	85	72
468	Portsmouth	2015	106.9	74	67
469	Portsmouth	2015	79.8	77	82
470	Portsmouth	2015	193.3	97	92
471	Portsmouth	2015	205.2	97	102
472	Portsmouth	2015	133.6	92	83
473	Portsmouth	2015	102.5	83	81
474	Portsmouth	2015	155.7	88	82
475	Portsmouth	2015	165.4	89	85
476	Portsmouth	2015	102.6	76	76
477	Portsmouth	2015	126.2	86	79
478	Portsmouth	2015	105.8	78	69
479	Portsmouth	2015	163.3	90	95
480	Portsmouth	2015	102.3	73	69
481	Portsmouth	2015	176.8	98	95
482	Portsmouth	2015	122.6	79	80
483	Portsmouth	2015	146.7	86	83
484	Portsmouth	2015	134.2	78	84
485	Portsmouth	2015	141	79	76
486	Portsmouth	2015	141.7	85	82
487	Portsmouth	2015	90.4	77	72
488	Portsmouth	2015	189.4	100	91
489	Portsmouth	2015	165.3	90	85
490	Portsmouth	2015	151.9	90	88
491	Portsmouth	2015	111.9	77	85
492	Portsmouth	2015	133.7	86	82
493	Portsmouth	2015	160.8	87	83
494	Portsmouth	2015	154.3	76	92
495	Portsmouth	2015	106.6	82	76
496	Portsmouth	2015	60.7	79	68
497	Portsmouth	2015	164.9	86	86
498	Portsmouth	2015	109.8	81	74
499	Portsmouth	2015	118.9	84	80
500	Portsmouth	2015	145.8	89	84
501	Portsmouth	2015	692.2	141	129	55
502	Portsmouth	2015	15.1	87	85	33
503	Portsmouth	2015	288.9	107	104	42
504	Portsmouth	2015	211.1	102	102	38
505	Portsmouth	2015	130.1	77	75	40
506	Portsmouth	2015	196	94	90	41
507	Portsmouth	2015	189.5	89	87	40
508	Portsmouth	2015	117.6	82	87	33
509	Portsmouth	2015	113.2	85	74	28
510	Portsmouth	2015	155	92	87	35
511	Portsmouth	2015	157.9	87	81	37
512	Portsmouth	2015	173.5	98	82	33
513	Portsmouth	2015	115.6	86	82	29
514	Portsmouth	2015	130.1	93	72	28
515	Portsmouth	2015	92.8	72	65	28
516	Portsmouth	2015	120.3	85	66	35
517	Portsmouth	2015	80.3	67	68	30
518	Portsmouth	2015	240.2	101	111	47
519	Portsmouth	2015	155.9	90	81	36
520	Portsmouth	2015	166.4	99	86	32
521	Portsmouth	2015	262.1	95	99	44
522	Portsmouth	2015	85.2	93	74	20
523	Portsmouth	2015	174.7	91	88	41
524	Portsmouth	2015	102.6	75	73	31
525	Portsmouth	2015	70	65	70	25
526	Portsmouth	2015	137.2	81	80	33
527	Portsmouth	2015	147.4	80	86	38
528	Portsmouth	2015	169.2	83	82	38
529	Portsmouth	2015	480	123	111	51
530	Portsmouth	2015	104.3	86	68	35
531	Portsmouth	2015	176.8	88	93	36
532	Portsmouth	2015	324	113	102	45
533	Portsmouth	2015	172.3	87	92	38
534	Portsmouth	2015	154.4	82	79	40
535	Portsmouth	2015	179.4	95	87	36
536	Portsmouth	2015	113.2	81	72	34
537	Portsmouth	2015	99	73	72	31
538	Portsmouth	2015	112.3	80	71	31
539	Portsmouth	2015	176.2	85	80	38
540	Portsmouth	2015	73.6	71	65	28
541	Portsmouth	2015	120.5	78	91	30
542	Portsmouth	2015	93.9	69	69	29
543	Portsmouth	2015	73.4	60	59	32
544	Portsmouth	2015	94.6	70	62	33
545	Portsmouth	2015	91.6	74	62	33
546	Portsmouth	2015	70.5	76	67	23
547	Portsmouth	2015	208.8	92	96	37
548	Portsmouth	2015	77.2	67	55	35
549	Portsmouth	2015	82.3	73	68	25
550	Portsmouth	2015	106.6	83	79	31
551	Portsmouth	2015	41.4	58	61	21
552	Portsmouth	2015	70	69	63	29
553	Portsmouth	2015	190	92	87	39
554	Portsmouth	2015	105.8	74	68	33
555	Portsmouth	2015	120	77	68	38
556	Portsmouth	2015	145.2	86	88	35
557	Portsmouth	2015	146.7	84	89	36
558	Portsmouth	2015	76.7	70	69	27
559	Portsmouth	2015	72.7	69	69	22
560	Portsmouth	2015	97.7	74	65	32
561	Portsmouth	2015	121.3	91	79	28
562	Portsmouth	2015	111.3	71	61	36
563	Portsmouth	2015	180.3	88	89	38
564	Portsmouth	2015	168	90	83	39
565	Portsmouth	2015	219	94	99	44
566	Portsmouth	2015	166	98	98	34
567	Portsmouth	2015	122.7	79	65	36
568	Portsmouth	2015	95.9	75	75	25
569	Portsmouth	2015	123.4	80	82	32
570	Portsmouth	2015	176.2	94	93	37
571	Portsmouth	2015	106.8	82	70	32
572	Portsmouth	2015	108.4	82	73	35
573	Portsmouth	2015	82.5	69	71	29
574	Portsmouth	2015	115.6	87	80	30
575	Portsmouth	2015	64.2	70	69	30
576	Portsmouth	2015	96	82	77	35
577	Portsmouth	2015	124.9	85	77	33
578	Portsmouth	2015	109.2	75	74	32
579	Portsmouth	2015	147.5	86	84	31
580	Portsmouth	2015	114.4	83	79	30
581	Portsmouth	2015	141.7	85	73	38
582	Portsmouth	2015	112.6	72	79	32
583	Portsmouth	2015	37.6	63	61	16
584	Portsmouth	2015	92.2	74	65	28
585	Portsmouth	2015	230.6	103	92	39
586	Portsmouth	2015	56.1	57	65	25
587	Portsmouth	2015	300.3	110	96	43
588	Portsmouth	2015	236.3	100	94	39
589	Portsmouth	2015	102.8	78	77	29
590	Portsmouth	2015	128.5	90	81	32
591	Portsmouth	2015	132.4	81	76	34
592	Portsmouth	2015	126.9	83	83	32
593	Portsmouth	2015	92.3	72	68	26
594	Portsmouth	2015	126.9	80	82	34
595	Portsmouth	2015	72.3	70	63	28
596	Portsmouth	2015	78.2	71	75	26
597	Portsmouth	2015	103.3	82	100	28
598	Portsmouth	2015	86.5	67	74	31
599	Portsmouth	2015	154.5	99	79	35
600	Portsmouth	2015	92.6	74	76	29
601	Portsmouth	2015	199.3	93	84	42
602	Portsmouth	2015	187.3	98	99	32
603	Portsmouth	2015	161.5	92	93	33
604	Portsmouth	2015	256.2	106	88	46
605	Portsmouth	2015	168.8	88	89	38
606	Portsmouth	2015	101	78	63	30
607	Portsmouth	2015	72.6	69	81	27
608	Portsmouth	2015	132.5	82	80	34
609	Portsmouth	2015	118.9	77	73	39
610	Portsmouth	2015	93.5	71	70	27
611	Portsmouth	2015	87.2	78	72	27
612	Portsmouth	2015	166.1	85	89	33
613	Portsmouth	2015	92.8	71	71	34
614	Portsmouth	2015	96.8	80	70	31
615	Portsmouth	2015	118.9	81	77	34
616	Portsmouth	2015	75.6	75	70	26
617	Portsmouth	2015	109.7	79	76	32
618	Portsmouth	2015	100.9	71	76	30
619	Portsmouth	2015	144.9	88	79	34
620	Portsmouth	2015	108.5	81	84	28
621	Portsmouth	2015	95.2	84	69	30
622	Portsmouth	2015	105.2	75	80	32
623	Portsmouth	2015	79.2	63	57	37
624	Portsmouth	2015	92.8	75	69	30
625	Portsmouth	2015	150.1	85	89	35
626	Portsmouth	2015	248.7	114	89	46
627	Portsmouth	2015	130	87	84	35
628	Portsmouth	2015	102.1	77	63	34
629	Portsmouth	2015	163.8	90	81	36
630	Portsmouth	2015	83.8	69	70	31
631	Portsmouth	2015	230.3	101	99	41
632	Portsmouth	2015	89.9	63	70	26
633	Portsmouth	2015	73.7	65	59	30
634	Portsmouth	2015	203	93	97	38
635	Portsmouth	2015	137.7	80	79	35
636	Portsmouth	2015	111.3	78	76	31
637	Portsmouth	2015	144.1	86	80	40
638	Portsmouth	2015	150.8	81	79	35
639	Portsmouth	2015	95	73	73	29
640	Portsmouth	2015	70.2	80	78	21
641	Portsmouth	2015	70	69	65	29
642	Portsmouth	2015	67.5	65	67	28
643	Portsmouth	2015	64.3	66	59	28
644	Portsmouth	2015	92.1	72	71	30
645	Portsmouth	2015	60.3	63	64	26
646	Portsmouth	2015	153.9	84	84	33
647	Portsmouth	2015	148.7	81	80	34
648	Portsmouth	2015	101.2	75	70	33
649	Portsmouth	2015	101.2	80	63	30
650	Portsmouth	2015	111.6	77	81	31
651	Portsmouth	2015	88.8	69	67	32
652	Portsmouth	2015	161	85	105	33
653	Portsmouth	2015	109.2	82	74	33
654	Portsmouth	2015	103.1	70	71	31
655	Portsmouth	2015	39	51	52	25
656	Portsmouth	2015	59.3	59	60	24
657	Portsmouth	2015	60.1	61	59	25
658	Portsmouth	2015	105.9	72	68	35
659	Portsmouth	2015	154.5	82	75	36
660	Portsmouth	2015	67.8	63	60	30
661	Portsmouth	2015	235	96	96	38
662	Portsmouth	2015	132.1	86	89	33
663	Portsmouth	2015	168.8	86	93	35
664	Portsmouth	2015	111.9	76	75	36
665	Portsmouth	2015	228	101	106	40
666	Portsmouth	2015	320.1	120	116	51
667	Portsmouth	2015	178.2	97	87	37
668	Portsmouth	2015	121.5	78	87	26
669	Portsmouth	2015	289.7	97	111	47
670	Portsmouth	2015	270.4	109	105	41
671	Portsmouth	2015	137.3	78	80	34
672	Portsmouth	2015	138.9	90	76	35
673	Portsmouth	2015	75.9	72	61	26
674	Portsmouth	2015	81	71	64	29
675	Portsmouth	2015	134.4	84	77	36
676	Portsmouth	2015	129.9	83	76	30
677	Portsmouth	2015	193.9	99	90	38
678	Portsmouth	2015	108.1	82	68	30
679	Portsmouth	2015	104.4	93	103	34
680	Portsmouth	2015	116.7	79	88	28
681	Portsmouth	2015	110	74	73	32
682	Portsmouth	2015	105.6	71	69	33
683	Portsmouth	2015	96.6	72	67	31
684	Portsmouth	2015	102.3	73	65	35
685	Portsmouth	2015	129.3	85	70	39
686	Portsmouth	2015	102.2	76	75	32
687	Portsmouth	2015	140.1	85	70	35
688	Portsmouth	2015	89.3	73	76	31
689	Portsmouth	2015	104.4	82	67	31
690	Portsmouth	2015	123.8	74	77	34
691	Portsmouth	2015	63.7	63	53	27
692	Portsmouth	2015	104.4	76	69	30
693	Portsmouth	2015	102.5	76	68	32
694	Portsmouth	2015	154.3	87	84	35
695	Portsmouth	2015	88.7	72	72	31
696	Portsmouth	2015	142.4	82	100	34
697	Portsmouth	2015	34.5	55	54	21
698	Portsmouth	2015	81.1	74	70	26
699	Portsmouth	2015	97.1	72	67	34
700	Portsmouth	2015	78.8	72	53	35
1	Langstone	2016	135.5	86	84	27
2	Langstone	2016	91.6	77	68	27
3	Langstone	2016	107.7	72	86	25
4	Langstone	2016	59.9	61	57	17
5	Langstone	2016	164.1	99	93	26
6	Langstone	2016	39.1	56	71	16
7	Langstone	2016	75.7	77	69	16
8	Langstone	2016	82	69	67	22
9	Langstone	2016	148	81	86	28
10	Langstone	2016	60.4	58	66	15
11	Langstone	2016	123.7	74	79	31
12	Langstone	2016	113.2	77	74	25
13	Langstone	2016	174.6	96	88	26
14	Langstone	2016	67.4	75	76	24
15	Langstone	2016	73.2	67	67	22
16	Langstone	2016	42.7	60	70	10
17	Langstone	2016	86.2	67	67	22
18	Langstone	2016	83.6	77	74	17
19	Langstone	2016	40.3	59	65	17
20	Langstone	2016	92.4	74	72	21
21	Langstone	2016	47.7	57	72	15
22	Langstone	2016	73.5	73	77	17
23	Langstone	2016	130.2	82	84	29
24	Langstone	2016	216.8	67	61	12
25	Langstone	2016	47.5	110	95	37
26	Langstone	2016	94.3	83	79	20
27	Langstone	2016	105.4	80	80	23
28	Langstone	2016	95.4	76	85	22
29	Langstone	2016	54.5	64	59	13
30	Langstone	2016	53.3	64	70	18
31	Langstone	2016	130.9	80	90	24
32	Langstone	2016	100	88	78	29
33	Langstone	2016	134.7	82	73	26
34	Langstone	2016	129.3	83	86	23
35	Langstone	2016	90.2	69	61	21
36	Langstone	2016	96	72	84	17
37	Langstone	2016	44	60	68	22
38	Langstone	2016	80.5	65	58	14
39	Langstone	2016	45.5	67	62	22
40	Langstone	2016	87.5	75	62	25
41	Langstone	2016	91.8	77	72	19
42	Langstone	2016	61.8	70	66	21
43	Langstone	2016	120.3	85	88	23
44	Langstone	2016	44.1	62	62	17
45	Langstone	2016	65.9	58	62	17
46	Langstone	2016	68.3	59	81	24
47	Langstone	2016	79.4	73	75	17
48	Langstone	2016	70.1	67	67	20
49	Langstone	2016	52.2	67	54	20
50	Langstone	2016	91.7	71	68	27
51	Langstone	2016	42.2	65	63	15
52	Langstone	2016	66.8	62	57	18
53	Langstone	2016	65.7	60	82	18
54	Langstone	2016	81.4	68	77	21
55	Langstone	2016	84.1	69	73	21
56	Langstone	2016	107	82	69	23
57	Langstone	2016	50	64	64	18
58	Langstone	2016	43	56	72	18
59	Langstone	2016	66.1	70	65	19
60	Langstone	2016	59.5	62	73	19
61	Langstone	2016	43.4	63	75	13
62	Langstone	2016	85	73	68	20
63	Langstone	2016	74.2	66	89	17
64	Langstone	2016	107.2	83	81	22
65	Langstone	2016	119	78	66	126
66	Langstone	2016	79.8	67	73	19
67	Langstone	2016	61.4	69	68	18
68	Langstone	2016	155.4	74	77	24
69	Langstone	2016	97.2	76	76	23
70	Langstone	2016	237.8	90	112	31
71	Langstone	2016	59.9	62	60	20
72	Langstone	2016	47.3	70	58	15
73	Langstone	2016	103	68	68	27
74	Langstone	2016	92.1	74	81	23
75	Langstone	2016	51.5	66	49	19
76	Langstone	2016	105.2	81	79	27
77	Langstone	2016	73.1	66	66	19
78	Langstone	2016	68.8	61	70	26
79	Langstone	2016	71.1	66	65	21
80	Langstone	2016	101	73	68	27
81	Langstone	2016	56.3	64	70	16
82	Langstone	2016	83.8	70	70	20
83	Langstone	2016	52.2	80	78	20
84	Langstone	2016	94.9	63	74	16
85	Langstone	2016	81	71	62	20
86	Langstone	2016	93.1	62	73	29
87	Langstone	2016	67.5	79	67	17
88	Langstone	2016	73	65	67	20
89	Langstone	2016	71.9	65	70	17
90	Langstone	2016	48.9	68	73	17
91	Langstone	2016	122.7	77	80	25
92	Langstone	2016	100.9	79	76	24
93	Langstone	2016	61.9	60	70	21
94	Langstone	2016	106.2	78	88	21
95	Langstone	2016	72.7	77	77	20
96	Langstone	2016	67.2	73	70	20
97	Langstone	2016	115.3	83	80	20
98	Langstone	2016	72.1	64	59	21
99	Langstone	2016	78	73	67	21
100	Langstone	2016	96.4	80	72	17
101	Langstone	2016	57.3	69	66	20
102	Langstone	2016	40.4	60	54	13
103	Langstone	2016	56.2	61	61	15
104	Langstone	2016	54.7	61	64	18
105	Langstone	2016	57.5	63	61	20
106	Langstone	2016	49.5	62	58	16
107	Langstone	2016	59.1	68	68	15
108	Langstone	2016	43.7	62	58	18
109	Langstone	2016	41	68	68	16
110	Langstone	2016	55.1	67	60	21
111	Langstone	2016	50.6	61	70	20
112	Langstone	2016	91.9	73	71	21
113	Langstone	2016	92.2	79	78	20
114	Langstone	2016	174.3	94	94	22
115	Langstone	2016	137	93	89	23
116	Langstone	2016	101.3	75	93	19
117	Langstone	2016	55.5	62	79	19
118	Langstone	2016	54.8	69	69	17
119	Langstone	2016	69.1	67	67	18
120	Langstone	2016	59	67	61	19
121	Langstone	2016	91.1	73	71	20
122	Langstone	2016	64.4	71	71	15
123	Langstone	2016	70.6	73	73	21
124	Langstone	2016	44.6	72	72	19
125	Langstone	2016	52.5	59	73	10
126	Langstone	2016	148	97	79	25
127	Langstone	2016	61.6	79	65	15
128	Langstone	2016	107.9	77	76	24
129	Langstone	2016	71.4	62	78	20
130	Langstone	2016	130.6	86	89	25
131	Langstone	2016	83.1	69	67	21
132	Langstone	2016	76.3	60	66	24
133	Langstone	2016	66.2	70	74	15
134	Langstone	2016	137.1	66	98	25
135	Langstone	2016	112.3	81	83	20
136	Langstone	2016	170	89	89	26
137	Langstone	2016	70.4	71	60	23
138	Langstone	2016	57.4	70	63	16
139	Langstone	2016	41.6	52	64	14
140	Langstone	2016	41.4	62	62	14
141	Langstone	2016	82	67	83	20
142	Langstone	2016	47.7	61	64	15
143	Langstone	2016	116.6	74	75	23
144	Langstone	2016	78.1	65	75	23
145	Langstone	2016	118.2	88	88	29
146	Langstone	2016	75	73	72	17
147	Langstone	2016	94.4	73	73	23
148	Langstone	2016	111.6	89	85	19
149	Langstone	2016	135.7	84	83	26
150	Langstone	2016	122	82	80	21
151	Langstone	2016	81.8	70	86	20
152	Langstone	2016	38.5	64	47	15
153	Langstone	2016	69.8	70	65	20
154	Langstone	2016	77.2	71	69	21
155	Langstone	2016	55.6	68	68	18
156	Langstone	2016	57.9	56	64	13
157	Langstone	2016	69.3	67	67	22
158	Langstone	2016	75.2	73	69	18
159	Langstone	2016	91.4	82	78	18
160	Langstone	2016	46.3	59	72	15
161	Langstone	2016	124.7	83	88	21
162	Langstone	2016	163.5	89	92	28
163	Langstone	2016	84.2	75	75	19
164	Langstone	2016	105.6	79	80	22
165	Langstone	2016	70.6	66	71	21
166	Langstone	2016	97.5	76	70	29
167	Langstone	2016	87	71	62	20
168	Langstone	2016	111.1	74	88	25
169	Langstone	2016	93.7	75	62	22
170	Langstone	2016	42.2	55	65	20
171	Langstone	2016	57.8	66	73	19
172	Langstone	2016	101.7	65	68	26
173	Langstone	2016	76.3	65	71	21
174	Langstone	2016	60.5	64	74	20
175	Langstone	2016	99.6	68	73	22
176	Langstone	2016	84.9	71	72	19
177	Langstone	2016	122	84	88	23
178	Langstone	2016	65	64	66	19
179	Langstone	2016	122.9	87	80	24
180	Langstone	2016	88.9	68	68	24
181	Langstone	2016	48.8	60	69	20
182	Langstone	2016	48.7	61	65	15
183	Langstone	2016	61.8	59	74	18
184	Langstone	2016	105.5	74	81	21
185	Langstone	2016	106.7	73	68	25
186	Langstone	2016	79.9	81	69	17
187	Langstone	2016	68	64	62	20
188	Langstone	2016	88.3	69	74	20
189	Langstone	2016	83.9	66	73	19
190	Langstone	2016	48.2	64	58	18
191	Langstone	2016	69.2	70	60	22
192	Langstone	2016	47.8	66	61	20
193	Langstone	2016	91	76	69	19
194	Langstone	2016	94.5	70	79	22
195	Langstone	2016	129.9	82	80	18
196	Langstone	2016	62	73	70	16
197	Langstone	2016	59.1	64	66	17
198	Langstone	2016	84.9	74	64	19
199	Langstone	2016	76.8	80	80	12
200	Langstone	2016	53.1	69	67	15
201	Langstone	2016	57.1	69	70	15
202	Langstone	2016	53.2	67	63	14
203	Langstone	2016	58.9	66	68	16
204	Langstone	2016	65.8	68	65	24
205	Langstone	2016	95	70	59	20
206	Langstone	2016	105.6	83	93	26
207	Langstone	2016	105	88	81	23
208	Langstone	2016	68.5	64	71	17
209	Langstone	2016	76.9	65	64	27
210	Langstone	2016	44	58	65	16
211	Langstone	2016	71.3	65	72	16
212	Langstone	2016	69.5	54	66	19
213	Langstone	2016	110.8	64	85	18
214	Langstone	2016	155.3	85	82	23
215	Langstone	2016	64.4	72	70	15
216	Langstone	2016	72.7	71	76	22
217	Langstone	2016	36.4	64	62	11
218	Langstone	2016	108.8	69	74	26
219	Langstone	2016	126.3	70	87	17
220	Langstone	2016	110.4	78	86	26
221	Langstone	2016	113	84	89	20
222	Langstone	2016	95.1	71	65	23
223	Langstone	2016	79.9	73	72	19
224	Langstone	2016	95.7	75	57	21
225	Langstone	2016	123.9	88	90	20
226	Langstone	2016	56.4	67	68	19
227	Langstone	2016	88.7	84	86	22
228	Langstone	2016	64.1	66	75	19
229	Langstone	2016	79.4	73	70	24
230	Langstone	2016	97.9	73	82	24
231	Langstone	2016	100.6	87	69	24
232	Langstone	2016	111.8	83	88	22
233	Langstone	2016	119.9	73	80	29
234	Langstone	2016	70.1	74	75	20
235	Langstone	2016	77.2	69	71	26
236	Langstone	2016	77.8	64	73	17
237	Langstone	2016	120.8	79	89	21
238	Langstone	2016	85.2	74	77	23
239	Langstone	2016	38.3	53	80	16
240	Langstone	2016	75.3	65	67	26
241	Langstone	2016	81.3	75	94	19
242	Langstone	2016	88.2	80	84	20
243	Langstone	2016	51.9	76	66	17
244	Langstone	2016	90.9	80	93	24
245	Langstone	2016	78.9	61	66	22
246	Langstone	2016	58.9	68	75	20
247	Langstone	2016	59.7	74	69	18
248	Langstone	2016	40.8	64	76	22
249	Langstone	2016	42.6	67	60	14
250	Langstone	2016	75.7	75	86	22
251	Langstone	2016	87.3	81	77	20
252	Langstone	2016	65.1	77	76	20
253	Langstone	2016	68.3	65	80	24
254	Langstone	2016	45.3	61	68	18
255	Langstone	2016	73.6	66	87	19
256	Langstone	2016	59.1	68	81	18
257	Langstone	2016	52.1	67	58	19
258	Langstone	2016	67.1	80	71	19
259	Langstone	2016	69.5	74	80	19
260	Langstone	2016	121	76	94	23
261	Langstone	2016	59.2	69	68	24
262	Langstone	2016	57.7	57	72	20
263	Langstone	2016	86.3	66	79	22
264	Langstone	2016	43.7	60	62	16
265	Langstone	2016	58.8	66	71	21
266	Langstone	2016	86	69	73	27
267	Langstone	2016	131	88	92	24
268	Langstone	2016	138.1	87	89	27
269	Langstone	2016	98.4	70	72	30
270	Langstone	2016	53.6	65	66	22
271	Langstone	2016	82.8	83	62	24
272	Langstone	2016	50.9	58	55	22
273	Langstone	2016	68.2	67	84	19
274	Langstone	2016	41.7	55	65	19
275	Langstone	2016	81.4	78	65	25
276	Langstone	2016	79.9	71	74	24
277	Langstone	2016	55.8	62	58	20
278	Langstone	2016	123	74	78	28
279	Langstone	2016	51.6	63	74	17
280	Langstone	2016	79.7	72	64	21
281	Langstone	2016	79.5	70	63	22
282	Langstone	2016	69.1	53	75	21
283	Langstone	2016	59	64	70	20
284	Langstone	2016	37.8	63	65	16
285	Langstone	2016	67.7	72	65	22
286	Langstone	2016	88.2	81	76	24
287	Langstone	2016	63	63	64	24
288	Langstone	2016	72.3	68	69	21
289	Langstone	2016	80.8	75	70	22
290	Langstone	2016	127.6	88	83	23
291	Langstone	2016	98	72	73	25
292	Langstone	2016	71.5	74	73	24
293	Langstone	2016	104.3	75	76	27
294	Langstone	2016	93.3	80	81	23
295	Langstone	2016	88.2	73	79	29
296	Langstone	2016	47.8	63	68	21
297	Langstone	2016	98.2	71	74	31
298	Langstone	2016	105.3	72	85	25
299	Langstone	2016	72.9	72	72	23
300	Langstone	2016	87.2	74	79	20
301	Langstone	2016	44.6	58	73	14
302	Langstone	2016	77.6	67	72	21
303	Langstone	2016	48	66	64	19
304	Langstone	2016	113.7	84	86	24
305	Langstone	2016	94.9	79	86	24
306	Langstone	2016	75.7	70	66	20
307	Langstone	2016	63.9	65	66	17
308	Langstone	2016	100	76	81	22
309	Langstone	2016	52	60	74	16
310	Langstone	2016	58.3	66	73	20
311	Langstone	2016	87.2	83	77	23
312	Langstone	2016	98.5	73	70	33
313	Langstone	2016	47.5	60	69	17
314	Langstone	2016	75.1	77	80	18
315	Langstone	2016	178.4	83	98	25
316	Langstone	2016	74.9	74	85	21
317	Langstone	2016	83.8	70	83	20
318	Langstone	2016	74.4	70	84	20
319	Langstone	2016	195.4	95	95	33
320	Langstone	2016	156.6	90	90	30
321	Langstone	2016	127.9	80	88	27
322	Langstone	2016	122.9	72	95	25
323	Langstone	2016	123.7	77	83	28
324	Langstone	2016	150.7	85	96	22
325	Langstone	2016	111.7	81	87	22
326	Langstone	2016	145.5	74	80	26
327	Langstone	2016	87.4	67	77	22
328	Langstone	2016	82	78	77	23
329	Langstone	2016	98.7	73	75	21
330	Langstone	2016	77.3	68	81	20
331	Langstone	2016	50.8	60	66	15
332	Langstone	2016	105	74	81	24
333	Langstone	2016	64.9	58	76	15
334	Langstone	2016	72.6	77	79	16
335	Langstone	2016	82.7	67	68	20
336	Langstone	2016	91.4	74	76	22
337	Langstone	2016	58.4	64	87	14
338	Langstone	2016	58.8	58	75	16
339	Langstone	2016	62.2	65	75	15
340	Langstone	2016	34.4	50	64	15
341	Langstone	2016	71.6	71	78	21
342	Langstone	2016	74.7	64	72	24
343	Langstone	2016	43.2	57	70	15
344	Langstone	2016	76.3	63	70	21
345	Langstone	2016	54.3	65	72	16
346	Langstone	2016	61.9	68	67	18
347	Langstone	2016	51.9	67	71	18
348	Langstone	2016	53	56	68	18
349	Langstone	2016	53.5	72	71	16
350	Langstone	2016	47.4	62	75	14
351	Langstone	2016	53	62	72	17
352	Langstone	2016	51.9	66	65	17
353	Langstone	2016	48.8	72	69	15
354	Langstone	2016	64.9	71	62	22
355	Langstone	2016	49.7	65	67	19
356	Langstone	2016	33.7	53	70	14
357	Langstone	2016	52.4	60	70	18
358	Langstone	2016	64.8	62	77	26
359	Langstone	2016	39.9	58	78	15
360	Langstone	2016	67.1	58	67	30
361	Langstone	2016	55.1	66	64	17
362	Langstone	2016	69.9	70	74	25
363	Langstone	2016	77.2	69	77	17
364	Langstone	2016	62	88	66	23
365	Langstone	2016	69.4	75	62	30
366	Langstone	2016	69.7	68	79	18
367	Langstone	2016	44.2	56	70	17
368	Langstone	2016	66.2	64	81	16
369	Langstone	2016	85.4	70	83	26
370	Langstone	2016	49.5	63	71	16
371	Langstone	2016	165.5	86	100	30
372	Langstone	2016	42.3	64	63	19
373	Langstone	2016	50.7	62	66	19
374	Langstone	2016	46.3	66	59	20
375	Langstone	2016	46.7	62	67	18
376	Langstone	2016	117.6	81	82	26
377	Langstone	2016	69.8	77	71	19
378	Langstone	2016	79.7	75	74	20
379	Langstone	2016	109.8	75	74	25
380	Langstone	2016	40.9	62	66	15
381	Langstone	2016	40.8	52	72	16
382	Langstone	2016	55.2	70	74	16
383	Langstone	2016	87.1	80	78	22
384	Langstone	2016	110.6	77	79	27
385	Langstone	2016	64.4	75	85	17
386	Langstone	2016	82.9	78	67	23
387	Langstone	2016	50.9	67	72	16
388	Langstone	2016	62.3	74	67	21
389	Langstone	2016	68.7	70	74	20
390	Langstone	2016	94.6	74	86	21
391	Langstone	2016	160.7	91	87	31
392	Langstone	2016	67.4	72	80	22
393	Langstone	2016	132.9	87	76	30
394	Langstone	2016	52.4	59	68	19
395	Langstone	2016	162.8	97	100	24
396	Langstone	2016	129.9	81	90	25
397	Langstone	2016	50.4	74	73	18
398	Langstone	2016	63.8	73	83	19
399	Langstone	2016	42.6	76	55	21
400	Langstone	2016	58.4	74	69	22
401	Langstone	2016	95.7	84	103	25
402	Langstone	2016	54.4	70	72	18
403	Langstone	2016	60.4	70	74	21
404	Langstone	2016	49.1	75	62	19
405	Langstone	2016	162.1	86	64	33
406	Langstone	2016	81.5	75	77	26
407	Langstone	2016	47	65	79	18
408	Langstone	2016	68.6	69	73	20
409	Langstone	2016	85.1	79	78	24
410	Langstone	2016	76.7	77	67	24
411	Langstone	2016	46.9	73	72	17
412	Langstone	2016	40.3	71	69	21
413	Langstone	2016	59.9	83	78	19
414	Langstone	2016	68.8	74	72	22
415	Langstone	2016	91.5	75	79	25
416	Langstone	2016	47.8	64	78	18
417	Langstone	2016	111	82	94	25
418	Langstone	2016	72.1	66	74	24
419	Langstone	2016	70	67	66	22
420	Langstone	2016	115.1	88	78	26
421	Langstone	2016	130.4	91	94	26
422	Langstone	2016	107	84	76	29
423	Langstone	2016	100.1	82	80	30
424	Langstone	2016	55.7	69	70	15
425	Langstone	2016	42.8	66	64	20
426	Langstone	2016	44.9	68	76	21
427	Langstone	2016	61.1	76	73	19
428	Langstone	2016	66	72	80	21
429	Langstone	2016	59.7	71	75	22
430	Langstone	2016	89.6	65	75	25
431	Langstone	2016	68.8	73	68	19
432	Langstone	2016	72.3	76	75	24
433	Langstone	2016	70.9	69	67	23
434	Langstone	2016	64.5	70	85	20
435	Langstone	2016	45.7	72	67	16
436	Langstone	2016	52	70	70	20
437	Langstone	2016	79.5	76	83	20
438	Langstone	2016	69	66	67	21
439	Langstone	2016	50.5	65	65	19
440	Langstone	2016	58.8	72	78	20
441	Langstone	2016	70.7	73	72	26
442	Langstone	2016	131.7	83	85	32
443	Langstone	2016	109.2	73	84	31
444	Langstone	2016	75.3	73	82	24
445	Langstone	2016	118	79	75	30
446	Langstone	2016	47.9	69	69	18
447	Langstone	2016	88.9	75	69	26
448	Langstone	2016	62.1	72	96	20
449	Langstone	2016	109.4	79	57	24
450	Langstone	2016	115.5	83	86	27
451	Langstone	2016	89.2	78	83	23
452	Langstone	2016	123.3	88	79	31
453	Langstone	2016	68.1	72	69	26
454	Langstone	2016	109.1	79	76	30
455	Langstone	2016	82.7	79	72	23
456	Langstone	2016	71.3	72	78	24
457	Langstone	2016	42.1	71	65	16
458	Langstone	2016	78.5	76	85	21
459	Langstone	2016	60.1	68	67	18
460	Langstone	2016	60.7	66	66	27
461	Langstone	2016	61.8	73	66	23
462	Langstone	2016	45.5	71	68	17
463	Langstone	2016	44.7	70	76	17
464	Langstone	2016	88.1	76	75	24
465	Langstone	2016	51.5	70	69	21
466	Langstone	2016	66.8	66	76	24
467	Langstone	2016	85.5	82	82	23
468	Langstone	2016	59.8	63	69	17
469	Langstone	2016	50	65	74	22
470	Langstone	2016	51.7	69	63	22
471	Langstone	2016	56.2	62	78	18
472	Langstone	2016	43.5	54	74	21
473	Langstone	2016	88.5	72	83	28
474	Langstone	2016	57.3	76	81	17
475	Langstone	2016	82.7	76	82	22
476	Langstone	2016	47.8	68	61	19
477	Langstone	2016	38.8	63	66	16
478	Langstone	2016	131.9	99	86	20
479	Langstone	2016	91.6	77	79	31
480	Langstone	2016	85.1	72	71	21
481	Langstone	2016	96.8	72	85	28
482	Langstone	2016	77.6	68	82	19
483	Langstone	2016	85.7	73	79	20
484	Langstone	2016	53.4	69	74	22
485	Langstone	2016	76.6	76	66	21
486	Langstone	2016	68.8	73	72	24
487	Langstone	2016	89.8	74	76	22
488	Langstone	2016	71.5	69	78	26
489	Langstone	2016	100.3	80	90	21
490	Langstone	2016	47.6	64	70	23
491	Langstone	2016	90.5	81	73	25
492	Langstone	2016	63.6	69	77	24
493	Langstone	2016	76.5	74	83	21
494	Langstone	2016	79.7	54	73	24
495	Langstone	2016	74.4	60	71	35
496	Langstone	2016	53	60	65	32
497	Langstone	2016	84.4	80	73	26
498	Langstone	2016	99.5	77	77	28
499	Langstone	2016	42.1	66	69	22
500	Langstone	2016	41.9	81	71	19
501	Langstone	2016	109	69	83	30
502	Langstone	2016	49.7	66	75	14
503	Langstone	2016	105.2	77	75	23
504	Langstone	2016	58.3	71	68	23
505	Langstone	2016	56	70	65	23
506	Langstone	2016	83	67	66	27
507	Langstone	2016	81.7	70	73	22
508	Langstone	2016	83.6	69	87	24
509	Langstone	2016	125.6	88	74	29
510	Langstone	2016	70.3	75	88	21
511	Langstone	2016	70.7	73	71	23
512	Langstone	2016	94.4	76	79	34
513	Langstone	2016	45.3	60	63	23
514	Langstone	2016	125	90	81	30
515	Langstone	2016	55.8	60	72	22
516	Langstone	2016	151.6	94	94	33
517	Langstone	2016	72	66	69	22
518	Langstone	2016	127.8	86	87	22
519	Langstone	2016	46.2	59	62	11
520	Langstone	2016	46.8	61	74	12
521	Langstone	2016	75.7	62	69	21
522	Langstone	2016	82.9	81	80	19
523	Langstone	2016	67.2	72	65	20
524	Langstone	2016	75.9	73	73	21
525	Langstone	2016	74.4	69	76	30
526	Langstone	2016	50.8	70	62	20
527	Langstone	2016	100.9	75	77	23
528	Langstone	2016	62.9	71	71	11
529	Langstone	2016	86.6	76	67	28
530	Langstone	2016	221	89	87	33
531	Langstone	2016	107.9	68	71	22
532	Langstone	2016	160.3	94	90	22
533	Langstone	2016	90.9	77	75	26
534	Langstone	2016	60.8	68	71	12
535	Langstone	2016	70.5	62	63	23
536	Langstone	2016	67.7	63	63	20
537	Langstone	2016	92.1	71	72	31
538	Langstone	2016	121.7	84	95	29
539	Langstone	2016	120.4	83	74	25
540	Langstone	2016	136.9	81	85	23
541	Langstone	2016	62.7	70	67	22
542	Langstone	2016	122.4	81	95	22
543	Langstone	2016	63.7	67	76	21
544	Langstone	2016	47.8	74	81	20
545	Langstone	2016	61.3	61	60	21
546	Langstone	2016	72.1	70	63	25
547	Langstone	2016	84.2	67	60	27
548	Langstone	2016	109	82	77	32
549	Langstone	2016	63.7	69	70	21
550	Langstone	2016	135.6	88	89	24
551	Langstone	2016	88.3	73	71	24
552	Langstone	2016	83.5	71	92	17
553	Langstone	2016	70.5	66	59	22
554	Langstone	2016	62.3	64	66	19
555	Langstone	2016	51.7	69	59	20
556	Langstone	2016	47.5	69	65	15
557	Langstone	2016	78.5	72	65	25
558	Langstone	2016	53.6	69	73	16
559	Langstone	2016	85.4	70	67	26
560	Langstone	2016	59.7	67	78	20
561	Langstone	2016	78.3	72	71	24
562	Langstone	2016	72.5	67	65	21
563	Langstone	2016	75.6	58	64	22
564	Langstone	2016	70.3	74	81	20
565	Langstone	2016	35.6	61	55	16
566	Langstone	2016	56.6	65	61	20
567	Langstone	2016	105.1	73	74	23
568	Langstone	2016	75.7	71	60	25
569	Langstone	2016	58.1	64	70	19
570	Langstone	2016	78.8	70	59	19
571	Langstone	2016	55.6	66	67	12
572	Langstone	2016	49.4	61	70	15
573	Langstone	2016	97.4	73	76	22
574	Langstone	2016	49.6	61	75	21
575	Langstone	2016	56.9	65	59	23
576	Langstone	2016	47.8	66	64	19
577	Langstone	2016	40.2	61	60	17
578	Langstone	2016	55.8	66	63	11
579	Langstone	2016	116.8	75	77	32
580	Langstone	2016	75.5	59	71	28
581	Langstone	2016	59.6	68	65	21
582	Langstone	2016	176.5	95	96	20
583	Langstone	2016	109.4	77	82	25
584	Langstone	2016	94.5	73	83	23
585	Langstone	2016	108.4	82	77	28
586	Langstone	2016	122.8	80	80	26
587	Langstone	2016	96	81	87	21
588	Langstone	2016	84.6	63	62	26
589	Langstone	2016	85.6	86	75	12
590	Langstone	2016	75.3	76	80	22
591	Langstone	2016	145.5	84	91	28
592	Langstone	2016	91.1	77	77	29
593	Langstone	2016	120.7	83	78	27
594	Langstone	2016	52.4	67	73	22
595	Langstone	2016	104.2	70	76	25
596	Langstone	2016	44.6	62	67	23
597	Langstone	2016	70.7	72	76	20
598	Langstone	2016	58.5	60	68	18
599	Langstone	2016	84.8	64	65	27
600	Langstone	2016	58.8	70	72	17
601	Langstone	2016	91.2	60	82	29
602	Langstone	2016	71.8	71	76	22
603	Langstone	2016	120.2	77	84	28
604	Langstone	2016	69.4	70	65	21
605	Langstone	2016	99.5	84	74	23
606	Langstone	2016	76	75	63	19
607	Langstone	2016	60.8	67	77	16
608	Langstone	2016	76	74	67	21
609	Langstone	2016	61.8	73	64	18
610	Langstone	2016	57.2	64	61	22
611	Langstone	2016	74	74	73	17
612	Langstone	2016	55.9	59	60	22
613	Langstone	2016	58.8	72	59	19
614	Langstone	2016	60.8	65	64	21
615	Langstone	2016	57.8	65	71	23
616	Langstone	2016	45.9	65	65	19
617	Langstone	2016	69.2	64	76	23
618	Langstone	2016	49.6	69	66	16
619	Langstone	2016	48	55	64	19
620	Langstone	2016	52	63	60	18
621	Langstone	2016	92.1	68	72	23
622	Langstone	2016	59	68	66	19
623	Langstone	2016	46.7	58	68	18
624	Langstone	2016	49	64	60	18
625	Langstone	2016	74.3	72	73	25
626	Langstone	2016	55.9	68	66	19
627	Langstone	2016	34.9	59	65	18
628	Langstone	2016	101.4	79	84	25
629	Langstone	2016	132.8	91	83	24
630	Langstone	2016	67.1	73	58	22
631	Langstone	2016	175.6	83	83	33
632	Langstone	2016	132.3	80	81	30
633	Langstone	2016	104.3	74	75	28
634	Langstone	2016	141.1	89	86	24
635	Langstone	2016	97.3	74	82	26
636	Langstone	2016	81.2	88	83	18
637	Langstone	2016	177.8	84	88	27
638	Langstone	2016	75.8	69	72	30
639	Langstone	2016	84.5	73	66	24
640	Langstone	2016	95.3	83	81	24
641	Langstone	2016	108.4	76	77	30
642	Langstone	2016	91.8	76	78	21
643	Langstone	2016	102.7	82	85	20
644	Langstone	2016	39.5	58	77	14
645	Langstone	2016	65.1	65	72	20
646	Langstone	2016	78.3	70	81	18
647	Langstone	2016	108.2	63	85	23
648	Langstone	2016	47.4	61	62	20
649	Langstone	2016	72.5	80	69	23
650	Langstone	2016	66.4	59	71	20
651	Langstone	2016	53.3	73	69	16
652	Langstone	2016	46.2	60	66	17
653	Langstone	2016	59.2	65	69	12
654	Langstone	2016	35.5	55	69	13
655	Langstone	2016	113.5	75	90	26
656	Langstone	2016	57.6	67	84	15
657	Langstone	2016	50.1	62	70	17
658	Langstone	2016	44.6	69	72	14
659	Langstone	2016	37	63	64	14
660	Langstone	2016	86.9	71	71	25
661	Langstone	2016	44.8	65	65	13
662	Langstone	2016	90.4	73	69	21
663	Langstone	2016	172.2	89	83	22
664	Langstone	2016	47.6	67	75	15
665	Langstone	2016	41.5	64	65	14
666	Langstone	2016	90	69	71	26
667	Langstone	2016	68.3	64	70	20
668	Langstone	2016	65.2	63	56	18
669	Langstone	2016	85.4	66	71	25
670	Langstone	2016	71.7	64	75	24
671	Langstone	2016	51.6	63	68	17
672	Langstone	2016	82.6	70	68	21
673	Langstone	2016	69.4	67	70	19
674	Langstone	2016	46	63	62	13
675	Langstone	2016	47.9	62	69	18
676	Langstone	2016	47.8	62	70	17
677	Langstone	2016	87	82	75	20
678	Langstone	2016	60.4	74	83	15
679	Langstone	2016	110.4	78	93	20
680	Langstone	2016	94.8	80	73	20
681	Langstone	2016	59.6	74	75	18
682	Langstone	2016	103.6	72	75	23
683	Langstone	2016	46.5	58	62	17
684	Langstone	2016	54.8	65	64	19
685	Langstone	2016	120.2	77	70	21
686	Langstone	2016	52.4	68	67	16
687	Langstone	2016	78.9	75	69	20
688	Langstone	2016	80	86	23	98.9
689	Langstone	2016	87	83	26	106.9
690	Langstone	2016	84	104	24	143.6
691	Langstone	2016	73	92	31	122.3
692	Langstone	2016	84	82	23	124.4
693	Langstone	2016	82	80	29	155.9
694	Langstone	2016	83	101	31	188.5
695	Langstone	2016	82	78	27	93.3
696	Langstone	2016	85	80	29	127.2
697	Langstone	2016	82	80	26	121.8
698	Langstone	2016	74	87	30	120.5
699	Langstone	2016	88	107	35	194.5
700	Langstone	2016	83	77	29	107.6
1	Chichester	2015	53.2	80	77
2	Chichester	2015	71	84	78
3	Chichester	2015	104	92	85
4	Chichester	2015	39	70	73
5	Chichester	2015	84	73	72
6	Chichester	2015	125	85	86
7	Chichester	2015	104	97	80
8	Chichester	2015	54	67	74
9	Chichester	2015	126	95	97
10	Chichester	2015	61	78	79
11	Chichester	2015	52	69	71
12	Chichester	2015	51	73	59
13	Chichester	2015	83	79	76
14	Chichester	2015	60	71	67
15	Chichester	2015	64	70	69
16	Chichester	2015	98	79	87
17	Chichester	2015	185	102	99
18	Chichester	2015	150	94	101
19	Chichester	2015	115	89	87
20	Chichester	2015	79	71	84
21	Chichester	2015	152	96	90
22	Chichester	2015	80	78	77
23	Chichester	2015	82	73	83
24	Chichester	2015	80	87	95
25	Chichester	2015	47	72	73
26	Chichester	2015	39	70	56
27	Chichester	2015	139	95	85
28	Chichester	2015	93	90	75
29	Chichester	2015	52	64	72
30	Chichester	2015	52	75	74
31	Chichester	2015	77	71	69
32	Chichester	2015	22	59	77
33	Chichester	2015	43	72	89
34	Chichester	2015	105	79	71
35	Chichester	2015	96	72	76
36	Chichester	2015	48	67	64
37	Chichester	2015	47	66	67
38	Chichester	2015	163	101	100
39	Chichester	2015	122	82	80
40	Chichester	2015	31	71	70
41	Chichester	2015	138	83	65
42	Chichester	2015	45	69	57
43	Chichester	2015	74	71	79
44	Chichester	2015	60	67	79
45	Chichester	2015	87	80	82
46	Chichester	2015	133	89	84
47	Chichester	2015	67	78	68
48	Chichester	2015	86	80	81
49	Chichester	2015	229	97	101.1
50	Chichester	2015	64	77	74
51	Chichester	2015	171	99	94
52	Chichester	2015	46	74	80
53	Chichester	2015	137	94	89
54	Chichester	2015	82	81	79
55	Chichester	2015	312	126	111
56	Chichester	2015	47	73	76
57	Chichester	2015	124	93	82
58	Chichester	2015	204	95	97
59	Chichester	2015	87	79	82
60	Chichester	2015	102	95	84
61	Chichester	2015	141	84	94
62	Chichester	2015	60	73	69
63	Chichester	2015	122	87	85
64	Chichester	2015	64	73	78
65	Chichester	2015	42	79	58
66	Chichester	2015	93	90	81
67	Chichester	2015	64	71	69
68	Chichester	2015	91	75	65
69	Chichester	2015	133	90	85
70	Chichester	2015	78	81	80
71	Chichester	2015	38	65	69
72	Chichester	2015	112	84	85
73	Chichester	2015	66	66	83
74	Chichester	2015	65	75	73
75	Chichester	2015	62	78	84
76	Chichester	2015	70	70	61
77	Chichester	2015	57	56	75
78	Chichester	2015	62	77	71
79	Chichester	2015	166	86	93
80	Chichester	2015	59	70	71
81	Chichester	2015	53	72	77
82	Chichester	2015	114	101	85
83	Chichester	2015	46	58	72
84	Chichester	2015	55	68	81
85	Chichester	2015	112	81	88
86	Chichester	2015	95	86	84
87	Chichester	2015	187	95	107
88	Chichester	2015	65	78	84
89	Chichester	2015	95	76	75
90	Chichester	2015	70	76	73
91	Chichester	2015	83	76	80
92	Chichester	2015	43	63	64
93	Chichester	2015	83	77	83
94	Chichester	2015	99	82	81
95	Chichester	2015	100	81	96
96	Chichester	2015	81	96	80
97	Chichester	2015	67	79	80
98	Chichester	2015	161	90	87
99	Chichester	2015	76	82	75
100	Chichester	2015	188	105	92
101	Chichester	2015	126	91	80
102	Chichester	2015	41	66	65
103	Chichester	2015	118	95	84
104	Chichester	2015	39	71	65
105	Chichester	2015	110	85	86
106	Chichester	2015	130	90	78
107	Chichester	2015	71	87	65
108	Chichester	2015	33	76	57
109	Chichester	2015	118	92	90
110	Chichester	2015	72	77	79
111	Chichester	2015	55	75	72
112	Chichester	2015	177	99	84
113	Chichester	2015	100	76	80
114	Chichester	2015	129	62	86
115	Chichester	2015	63	72	74
116	Chichester	2015	74	71	89
117	Chichester	2015	55	70	53
118	Chichester	2015	79	77	74
119	Chichester	2015	49	61	69
120	Chichester	2015	61	66	74
121	Chichester	2015	67	73	66
122	Chichester	2015	70	76	79
123	Chichester	2015	72	76	80
124	Chichester	2015	80	61	59
125	Chichester	2015	73	79	80
126	Chichester	2015	66	69	74
127	Chichester	2015	59	71	67
128	Chichester	2015	162	90	85
129	Chichester	2015	51	72	74
130	Chichester	2015	90	72	79
131	Chichester	2015	65	68	71
132	Chichester	2015	152	95	79
133	Chichester	2015	70	74	84
134	Chichester	2015	53	64	67
135	Chichester	2015	91	80	81
136	Chichester	2015	67	67	87
137	Chichester	2015	49	73	65
138	Chichester	2015	54	63	71
139	Chichester	2015	84	79	72
140	Chichester	2015	36	66	63
141	Chichester	2015	77	75	72
142	Chichester	2015	92	75	80
143	Chichester	2015	113	77	72
144	Chichester	2015	81	70	65
145	Chichester	2015	79	63	71
146	Chichester	2015	26	61	65
147	Chichester	2015	64	80	81
148	Chichester	2015	113	85	84
149	Chichester	2015	56	77	83
150	Chichester	2015	99	85	77
151	Chichester	2015	67	80	79
152	Chichester	2015	65	69	73
153	Chichester	2015	59	68	69
154	Chichester	2015	67	84	82
155	Chichester	2015	105	86	80
156	Chichester	2015	72	70	68
157	Chichester	2015	68	67	70
158	Chichester	2015	108	82	83
159	Chichester	2015	82	82	75
160	Chichester	2015	26	67	66
161	Chichester	2015	66	72	71
162	Chichester	2015	87	78	75
163	Chichester	2015	69	68	84
164	Chichester	2015	50	63	63
165	Chichester	2015	135	87	79
166	Chichester	2015	34	63	65
167	Chichester	2015	87	72	74
168	Chichester	2015	91	75	75
169	Chichester	2015	39	60	62
170	Chichester	2015	64	70	70
171	Chichester	2015	77	74	73
172	Chichester	2015	36	65	64
173	Chichester	2015	113	75	74
174	Chichester	2015	64	83	85
175	Chichester	2015	152	89	91
176	Chichester	2015	110	85	82
177	Chichester	2015	68	68	62
178	Chichester	2015	61	65	68
179	Chichester	2015	62	79	73
180	Chichester	2015	75	77	76
181	Chichester	2015	109	78	77
182	Chichester	2015	178	85	91
183	Chichester	2015	72	72	73
184	Chichester	2015	84	88	69
185	Chichester	2015	51	65	69
186	Chichester	2015	32	66	69
187	Chichester	2015	59	69	75
188	Chichester	2015	95	79	83
189	Chichester	2015	93	79	82
190	Chichester	2015	89	83	81
191	Chichester	2015	113	84	83
192	Chichester	2015	68	80	80
193	Chichester	2015	76	69	67
194	Chichester	2015	24	67	71
195	Chichester	2015	68	68	64
196	Chichester	2015	146	90	88
197	Chichester	2015	137	95	97
198	Chichester	2015	35	66	63
199	Chichester	2015	51	68	74
200	Chichester	2015	82	71	64
201	Chichester	2015	84	63	68
202	Chichester	2015	54	70	79
203	Chichester	2015	41	66	64
204	Chichester	2015	93	79	80
205	Chichester	2015	33	60	60
206	Chichester	2015	74	75	68
207	Chichester	2015	137	90	75
208	Chichester	2015	108	73	77
209	Chichester	2015	76	68	81
210	Chichester	2015	46	65	60
211	Chichester	2015	63	64	72
212	Chichester	2015	59	76	71
213	Chichester	2015	168	91	97
214	Chichester	2015	122	85	78
215	Chichester	2015	93	74	94
216	Chichester	2015	76	76	67
217	Chichester	2015	85	61	67
218	Chichester	2015	47	58	70
219	Chichester	2015	67	70	80
220	Chichester	2015	62	70	68
221	Chichester	2015	57	63	64
222	Chichester	2015	108	80	74
223	Chichester	2015	10	35	44
224	Chichester	2015	80	74	68
225	Chichester	2015	130	95	82
226	Chichester	2015	50	60	74
227	Chichester	2015	52	64	70
228	Chichester	2015	52	69	65
229	Chichester	2015	71	75	69
230	Chichester	2015	70.2	68	74
231	Chichester	2015	47	72	54
232	Chichester	2015	71	73	64
233	Chichester	2015	71	68	69
234	Chichester	2015	38	63	63
235	Chichester	2015	86	74	66
236	Chichester	2015	69	64	73
237	Chichester	2015	80	73	70
238	Chichester	2015	96	92	63
239	Chichester	2015	40	64	76
240	Chichester	2015	95	80	89
241	Chichester	2015	102	90	95
242	Chichester	2015	62	76	63
243	Chichester	2015	75	75	70
244	Chichester	2015	31	56	66
245	Chichester	2015	69	64	72
246	Chichester	2015	40	50	70
247	Chichester	2015	61	74	70
248	Chichester	2015	58	65	70
249	Chichester	2015	132	86	94
250	Chichester	2015	55	67	67
251	Chichester	2015	61	63	69
252	Chichester	2015	74	75	59
253	Chichester	2015	55	56	90
254	Chichester	2015	43	62	75
255	Chichester	2015	52	64	72
256	Chichester	2015	52	75	63
257	Chichester	2015	82	81	66
258	Chichester	2015	51	64	75
259	Chichester	2015	80	78	87
260	Chichester	2015	44	73	49
261	Chichester	2015	45	69	64
262	Chichester	2015	84	71	79
263	Chichester	2015	98	71	80
264	Chichester	2015	40	65	62
265	Chichester	2015	66	65	70
266	Chichester	2015	68	74	78
267	Chichester	2015	42	70	50
268	Chichester	2015	63	60	72
269	Chichester	2015	73	65	63
270	Chichester	2015	48	73	66
271	Chichester	2015	74	68	64
272	Chichester	2015	82	81	87
273	Chichester	2015	68	70	59
274	Chichester	2015	64	71	70
275	Chichester	2015	76	64	80
276	Chichester	2015	66	80	71
277	Chichester	2015	83	91	86
278	Chichester	2015	63	66	65
279	Chichester	2015	41	67	55
280	Chichester	2015	78	66	67
281	Chichester	2015	66	65	71
282	Chichester	2015	48	52	71
283	Chichester	2015	129	82	102
284	Chichester	2015	60	68	72
285	Chichester	2015	76	68	81
286	Chichester	2015	94	64	85
287	Chichester	2015	100	81	80
288	Chichester	2015	35	55	64
289	Chichester	2015	69	70	65
290	Chichester	2015	86	70	80
291	Chichester	2015	82	69	84
292	Chichester	2015	77	73	67
293	Chichester	2015	53	63	65
294	Chichester	2015	68	70	65
295	Chichester	2015	76	75	70
296	Chichester	2015	146	85	93
297	Chichester	2015	75	64	85
298	Chichester	2015	118	86	87
299	Chichester	2015	126	83	73
300	Chichester	2015	47	78	65
301	Chichester	2015	55	69	64
302	Chichester	2015	134	76	81
303	Chichester	2015	80	65	72
304	Chichester	2015	90	68	93
305	Chichester	2015	36	57	73
306	Chichester	2015	66	63	73
307	Chichester	2015	40	70	70
308	Chichester	2015	180	87	92
309	Chichester	2015	50	68	66
310	Chichester	2015	175	99	97
311	Chichester	2015	65	60	75
312	Chichester	2015	74	67	77
313	Chichester	2015	157	90	95
314	Chichester	2015	71	78	72
315	Chichester	2015	115	72	80
316	Chichester	2015	52	68	73
317	Chichester	2015	98	76	77
318	Chichester	2015	179.5	129	103
319	Chichester	2015	160	95	87
320	Chichester	2015	228	107	99
321	Chichester	2015	197.67	106	93
322	Chichester	2015	123.85	82	87
323	Chichester	2015	86.85	92	77
324	Chichester	2015	142.37	92	95
325	Chichester	2015	63.85	75	81
326	Chichester	2015	118.13	89	100
327	Chichester	2015	133.91	91	82
328	Chichester	2015	113.99	79	88
329	Chichester	2015	47.36	70	75
330	Chichester	2015	316.6	134	115
331	Chichester	2015	61.6	83	83
332	Chichester	2015	63.2	78	77
333	Chichester	2015	81.3	80	85
334	Chichester	2015	92	94	87
335	Chichester	2015	75.6	72	62
336	Chichester	2015	106.2	92	79
337	Chichester	2015	98.5	86	78
338	Chichester	2015	88	86	86
339	Chichester	2015	35.2	61	76
340	Chichester	2015	115.9	92	73
341	Chichester	2015	83.9	84	76
342	Chichester	2015	85.3	78	75
343	Chichester	2015	73	71	93
344	Chichester	2015	61.6	74	72
345	Chichester	2015	68.9	75	71
346	Chichester	2015	69.5	80	74
347	Chichester	2015	34.1	55	60
348	Chichester	2015	50.3	74	74
349	Chichester	2015	31.5	59	64
350	Chichester	2015	150.2	100	91
351	Chichester	2015	70	78	75
352	Chichester	2015	107.5	91	81
353	Chichester	2015	38.1	69	80
354	Chichester	2015	71.9	70	78
355	Chichester	2015	43.8	73	66
356	Chichester	2015	146.2	96	96
357	Chichester	2015	69.4	73	72
358	Chichester	2015	44.1	66	68
359	Chichester	2015	32.1	58	72
360	Chichester	2015	36.2	63	73
361	Chichester	2015	31.8	69	75
362	Chichester	2015	59.1	72	73
363	Chichester	2015	65.5	75	83
364	Chichester	2015	80.1	79	82
365	Chichester	2015	100.1	79	74
366	Chichester	2015	81.1	81	81
367	Chichester	2015	28.6	62	70
368	Chichester	2015	54.9	70	67
369	Chichester	2015	56.3	78	73
370	Chichester	2015	97.2	92	75
371	Chichester	2015	161.6	101	92
372	Chichester	2015	51.7	76	71
373	Chichester	2015	111	90	75
374	Chichester	2015	59.9	70	85
375	Chichester	2015	39.6	65	67
376	Chichester	2015	100.3	90	80
377	Chichester	2015	56.3	71	73
378	Chichester	2015	70.5	78	82
379	Chichester	2015	61.8	78	68
380	Chichester	2015	62.2	79	65
381	Chichester	2015	64.6	88	68
382	Chichester	2015	41.9	71	92
383	Chichester	2015	56.8	68	68
384	Chichester	2015	49.8	65	64
385	Chichester	2015	65.5	76	78
386	Chichester	2015	68.4	85	76
387	Chichester	2015	54.1	72	70
388	Chichester	2015	65.8	79	73
389	Chichester	2015	250	120	103
390	Chichester	2015	121.6	87	77
391	Chichester	2015	53.4	74	59
392	Chichester	2015	65.5	70	78
393	Chichester	2015	58.6	62	66
394	Chichester	2015	52.5	69	74
395	Chichester	2015	29.3	59	73
396	Chichester	2015	54.1	80	79
397	Chichester	2015	115.3	86	81
398	Chichester	2015	50.4	70	76
399	Chichester	2015	68	70	66
400	Chichester	2015	51.3	71	65
401	Chichester	2015	84.2	67	72
402	Chichester	2015	57.2	62	82
403	Chichester	2015	44.3	68	67
404	Chichester	2015	64.9	83	85
405	Chichester	2015	49.2	67	78
406	Chichester	2015	75.8	74	68
407	Chichester	2015	80.4	91	90
408	Chichester	2015	54.8	65	71
409	Chichester	2015	44.2	66	67
410	Chichester	2015	88.5	78	83
411	Chichester	2015	129.3	88	81
412	Chichester	2015	96.4	82	80
413	Chichester	2015	67.5	79	75
414	Chichester	2015	76.9	76	85
415	Chichester	2015	75.8	78	82
416	Chichester	2015	77.4	81	80
417	Chichester	2015	67.1	76	69
418	Chichester	2015	51.9	64	69
419	Chichester	2015	87.5	76	73
420	Chichester	2015	61	56	76
421	Chichester	2015	76.2	74	70
422	Chichester	2015	47	65	63
423	Chichester	2015	51.2	71	69
424	Chichester	2015	58.4	71	74
425	Chichester	2015	48.9	75	79
426	Chichester	2015	58	82	65
427	Chichester	2015	97	81	79
428	Chichester	2015	67.8	71	72
429	Chichester	2015	68.5	57	74
430	Chichester	2015	112.9	76	93
431	Chichester	2015	52.3	62	68
432	Chichester	2015	56.3	64	81
433	Chichester	2015	82	69	67
434	Chichester	2015	159.8	99	84
435	Chichester	2015	74.7	73	74
436	Chichester	2015	56.3	71	67
437	Chichester	2015	31.4	52	68
438	Chichester	2015	59.5	68	71
439	Chichester	2015	69.9	71	54
440	Chichester	2015	434.5	149	101
441	Chichester	2015	79.6	75	67
442	Chichester	2015	220.9	119	90
443	Chichester	2015	98.3	70	71
444	Chichester	2015	114.3	86	76
445	Chichester	2015	50.4	68	65
446	Chichester	2015	67.7	78	73
447	Chichester	2015	61.3	67	66
448	Chichester	2015	95.3	76	63
449	Chichester	2015	81.5	87	62
450	Chichester	2015	42.8	66	65
451	Chichester	2015	99.7	83	74
452	Chichester	2015	135.7	83	75
453	Chichester	2015	94.7	71	72
454	Chichester	2015	94.2	72	87
455	Chichester	2015	97.2	82	76
456	Chichester	2015	52.1	66	69
457	Chichester	2015	38.4	69	60
458	Chichester	2015	47	56	72
459	Chichester	2015	78.4	77	81
460	Chichester	2015	69.1	81	72
461	Chichester	2015	42.6	66	58
462	Chichester	2015	57.1	73	67
463	Chichester	2015	78.1	62	63
464	Chichester	2015	53.3	62	72
465	Chichester	2015	67.4	93	70
466	Chichester	2015	62.7	63	70
467	Chichester	2015	65.2	62	75
468	Chichester	2015	90.9	82	77
469	Chichester	2015	58.9	58	66
470	Chichester	2015	48.3	63	61
471	Chichester	2015	122.7	86	83
472	Chichester	2015	75.5	78	73
473	Chichester	2015	55.5	65	61
474	Chichester	2015	55.8	63	63
475	Chichester	2015	55.4	69	56
476	Chichester	2015	60.5	67	58
477	Chichester	2015	43.5	65	52
478	Chichester	2015	44.6	56	49
479	Chichester	2015	55.3	59	66
480	Chichester	2015	64.9	78	74
481	Chichester	2015	44.4	51	64
482	Chichester	2015	24.4	48	60
483	Chichester	2015	53.8	70	56
484	Chichester	2015	46	72	64
485	Chichester	2015	73	69	61
486	Chichester	2015	44.9	57	71
487	Chichester	2015	31.1	59	57
488	Chichester	2015	95.5	76	83
489	Chichester	2015	57.4	69	71
490	Chichester	2015	153.9	87	91
491	Chichester	2015	141.6	91	80
492	Chichester	2015	34.5	56	72
493	Chichester	2015	119.5	76	77
494	Chichester	2015	42.8	72	62
495	Chichester	2015	140.5	82	76
496	Chichester	2015	151.9	90	98
497	Chichester	2015	155.4	80	83
498	Chichester	2015	47.6	89	56
499	Chichester	2015	84.7	81	72
500	Chichester	2015	111.8	83	69
501	Chichester	2015	53.1	73	68	16
502	Chichester	2015	59.4	62	71	17
503	Chichester	2015	136.8	76	80	21
504	Chichester	2015	56.8	69	66	20
505	Chichester	2015	76.6	72	82	22
506	Chichester	2015	86.5	67	71	18
507	Chichester	2015	48.7	58	61	16
508	Chichester	2015	74.6	73	77	18
509	Chichester	2015	79.2	70	70	21
510	Chichester	2015	78.5	76	80	19
511	Chichester	2015	79.6	82	69	20
512	Chichester	2015	49.1	65	67	17
513	Chichester	2015	81.6	73	68	23
514	Chichester	2015	67.5	75	68	18
515	Chichester	2015	68.1	75	59	19
516	Chichester	2015	82.1	62	67	15
517	Chichester	2015	117.6	75	65	27
518	Chichester	2015	45.4	59	63	18
519	Chichester	2015	58.4	70	62	15
520	Chichester	2015	123.8	73	70	19
521	Chichester	2015	64.2	71	70	20
522	Chichester	2015	56.3	68	58	22
523	Chichester	2015	48	60	68	20
524	Chichester	2015	95.3	72	86	21
525	Chichester	2015	104.1	82	81	24
526	Chichester	2015	173.4	119	88	29
527	Chichester	2015	60.9	69	76	17
528	Chichester	2015	56.3	57	65	23
529	Chichester	2015	189.6	114	84	31
530	Chichester	2015	51	61	62	16
531	Chichester	2015	61.3	62	68	17
532	Chichester	2015	255.6	109	90	35
533	Chichester	2015	100.1	83	73	20
534	Chichester	2015	75.2	75	72	22
535	Chichester	2015	59.8	68	62	18
536	Chichester	2015	107.5	75	72	27
537	Chichester	2015	113.1	79	80	25
538	Chichester	2015	37.1	54	62	15
539	Chichester	2015	57.3	62	67	22
540	Chichester	2015	65.3	75	62	20
541	Chichester	2015	59.1	67	72	18
542	Chichester	2015	79.2	73	70	21
543	Chichester	2015	58.3	65	63	16
544	Chichester	2015	44.8	59	68	18
545	Chichester	2015	72.6	68	67	19
546	Chichester	2015	44.4	63	61	18
547	Chichester	2015	60.8	65	68	16
548	Chichester	2015	55.7	72	56	17
549	Chichester	2015	66.8	64	61	20
550	Chichester	2015	76.6	63	64	21
551	Chichester	2015	121.9	89	83	22
552	Chichester	2015	64.9	75	64	20
553	Chichester	2015	56	66	68	18
554	Chichester	2015	64.6	65	62	14
555	Chichester	2015	174.8	85	78	30
556	Chichester	2015	83.1	68	54	23
557	Chichester	2015	103	79	90	21
558	Chichester	2015	62	65	55	19
559	Chichester	2015	46.7	57	67	17
560	Chichester	2015	71	68	68	23
561	Chichester	2015	49.1	61	66	19
562	Chichester	2015	51	52	62	18
563	Chichester	2015	43	58	62	15
564	Chichester	2015	43.5	66	62	18
565	Chichester	2015	55.6	70	59	17
566	Chichester	2015	69.4	70	69	19
567	Chichester	2015	69.2	73	78	18
568	Chichester	2015	164.8	96	84	36
569	Chichester	2015	84.3	68	69	24
570	Chichester	2015	40.8	59	53	16
571	Chichester	2015	45.5	68	65	18
572	Chichester	2015	56.3	64	82	19
573	Chichester	2015	47.5	58	63	17
574	Chichester	2015	33.5	50	61	12
575	Chichester	2015	60.1	64	72	18
576	Chichester	2015	76.7	70	60	20
577	Chichester	2015	78.4	68	60	23
578	Chichester	2015	29.4	60	50	15
579	Chichester	2015	58.5	67	57	19
580	Chichester	2015	52.8	66	59	18
581	Chichester	2015	103	83	77	20
582	Chichester	2015	56.2	66	65	16
583	Chichester	2015	43.9	64	63	15
584	Chichester	2015	76.1	63	56	24
585	Chichester	2015	80.4	62	75	24
586	Chichester	2015	48.7	70	68	18
587	Chichester	2015	42.7	62	67	18
588	Chichester	2015	46.4	60	70	19
589	Chichester	2015	83.4	55	67	25
590	Chichester	2015	93.8	80	76	20
591	Chichester	2015	34.6	60	53	15
592	Chichester	2015	64.5	72	67	20
593	Chichester	2015	51.1	59	63	17
594	Chichester	2015	41.5	69	57	15
595	Chichester	2015	71.3	73	77	20
596	Chichester	2015	76.7	77	70	19
597	Chichester	2015	49.3	55	61	21
598	Chichester	2015	49.6	56	75	16
599	Chichester	2015	39.7	63	57	16
[truncated: 101 more rows]
