# Supplementary material for: Active management is required to turn the tide for depleted Ostrea edulis stocks from the effects of overfishing, disease and invasive species
Source: PeerJ. 2019 Feb 28;7:e6431. doi: 10.7717/peerj.6431 (PMC6397756; doi:10.7717/peerj.6431)
Supplement: Supplemental Information 2 [file peerj-07-6431-s002.xlsx]

## Sheet: Chichester and Portsmouth CI 
Harbour	Replicate	Max Length (mm)	Max Width (mm)	Max Depth (mm)	Weight (g)	CI	Haplosporidian	B. ostreae
Chichester	1	118	96	45	339.9	3.35114	0	0
Chichester	2	80	69	30	119.6	2.89791	0	0
Chichester	3	102	87	42	158.1	4.67507	0	0
Chichester	4	80	89	21	86.9	1.71827	1	1
Chichester	5	112	87	39	233.1	4.86003	1	1
Chichester	6	75	70	19	56.1	2.38579	1	1
Chichester	7	82	83	27	105.5	4.49275	1	0
Chichester	8	82	89	20	70.7	1.22371	1	0
Chichester	9	83	85	25	128.5	3.84437	1	0
Chichester	10	77	77	22	65.5	3.98169	0	0
Chichester	11	77	87	21	65.9	2.85714	1	0
Chichester	12	69	66	22	48.3	2.08904	1	0
Chichester	13	68	62	22	61.5	1.85102	1	1
Chichester	14	87	69	21	64.7	2.04444	1	0
Chichester	15	67	75	21	53.2	1.27072	1	1
Chichester	16	81	95	22	80.9	2.13504	1	0
Chichester	17	75	80	22	67.6	13.4298	1	1
Chichester	18	73	82	26	81.3	4.29616	1	0
Chichester	19	81	72	16	51.8	3.90244	1	1
Chichester	20	88	93	20	92.4	1.48415	0	0
Chichester	21	76	70	18	59.8	2.65985	1	1
Chichester	22	106	85	30	154.5	3.13446	0	0
Chichester	23	98	88	33	162.4	2.48813	1	1
Chichester	24	81	87	26	108.2	2.17325	1	0
Chichester	25	87	87	31	112.8		0	0
Chichester	26	134	104	48	363.2		0	0
Chichester	27	96	77	26	94.5		0	0
Chichester	28	72	84	18	53.3		1	1
Chichester	29	90	97	30	161.8		0	0
Chichester	30	105	92	42	184.5		1	0
Chichester	31	92	99	26	132.5		0	0
Chichester	32	122	99	44	288.6		1	0
Chichester	33	103	97	30	157.1		0	0
Chichester	34	98	80	44	204		0	0
Chichester	35	100	80	41	208.1		0	0
Chichester	36	89	82	34	127.2		0	0
Chichester	37	77	86	22	77.6		0	0
Chichester	38	79	82	23	66.7		1	0
Chichester	39	75	80	30	113.8		1	0
Chichester	40	69	70	25	58.5		0	0
Chichester	41	75	99	20	68		0	0
Chichester	42	70	80	20	52.9		1	0
Chichester	43	65	82	24	57.5		0	0
Chichester	44	70	77	23	48.3		0	0
Chichester	45	71	77	27	72.5		1	0
Chichester	46	57	81	11	22.6		0	0
Chichester	47	68	81	21	61.6		0	0
Chichester	48	69	65	18	53.4		0	0
Portsmouth	1	92	88	37	145.1	1.86679	1	0
Portsmouth	2	84	76	34	129	2.82996	1	0
Portsmouth	3	98	94	32	168.7	2.55265	1	0
Portsmouth	4	93	89	35	136.9	2.70787	1	0
Portsmouth	5	92	89	40	216.8	2.81228	1	0
Portsmouth	6	99	90	36	187.2	7.65367	1	0
Portsmouth	7	85	78	42	177.8	3.58359	0	0
Portsmouth	8	78	77	33	117.3	6.2234	1	0
Portsmouth	9	85	78	32	122.5	2.32587	0	0
Portsmouth	10	98	97	33	150.3	3.90217	0	0
Portsmouth	11	85	83	35	134.3	5.68153	0	0
Portsmouth	12	97	87	28	147.4	2.70613
Portsmouth	13	78	64	40	126.3	2.57471	0	0
Portsmouth	14	79	72	31	104.3	0.382775	0	0
Portsmouth	15	88	80	30	126	3.03571	0	0
Portsmouth	16	90	70	34	111.1	5.44582	0	0
Portsmouth	17	80	78	36	117.1	8.24191	0	0
Portsmouth	18	77	82	31	106	1.28173	0	0
Portsmouth	19	84	75	32	117.4	3.08564	0	0
Portsmouth	20	85	77	35	139.9	7.72675	0	0
Portsmouth	21	76	75	29	107.6	3.31258	0	0
Portsmouth	22	63	67	25	65.3	2.3608	0	0
Portsmouth	23	72	72	33	88.2	6.57509	1	0
Portsmouth	24	79	69	36	103	6.4526	0	0
Portsmouth	25	87	87	31	112.8		0	0
Portsmouth	26	134	104	48	363.2
Portsmouth	27	96	77	26	94.5
Portsmouth	28	72	84	18	53.3		0	0
Portsmouth	29	90	97	30	161.8		0	0
Portsmouth	30	105	92	42	184.5		0	0
Portsmouth	31	92	99	26	132.5		0	0
Portsmouth	32	122	99	44	288.6		0	0
Portsmouth	33	103	97	30	157.1		0	0
Portsmouth	34	98	80	44	204		0	0
Portsmouth	35	100	80	41	208.1		0	0
Portsmouth	36	89	82	34	127.2		0	0
Portsmouth	37	77	86	22	77.6		0	0
Portsmouth	38	79	82	23	66.7		0	0
Portsmouth	39	75	80	30	113.8		1	0
Portsmouth	40	69	70	25	58.5		0	0
Portsmouth	41	75	99	20	68		0	0
Portsmouth	42	70	80	20	52.9		0	0
Portsmouth	43	65	62	24	57.5		0	0
Portsmouth	44	70	77	23	48.3		0	0
Portsmouth	45	71	77	27	72.5		0	0
Portsmouth	46	57	81	11	22.6		0	0
Portsmouth	47	68	81	21	61.6		0	0
Portsmouth	48	69	65	18	53.4		1	0
