# Supplementary material for: Active management is required to turn the tide for depleted Ostrea edulis stocks from the effects of overfishing, disease and invasive species
Source: PeerJ. 2019 Feb 28;7:e6431. doi: 10.7717/peerj.6431 (PMC6397756; doi:10.7717/peerj.6431)
Supplement: Supplemental Information 3 — 2017 van veen grab survey of Portsmouth, Langstone and Chichester Harbours, Solent, UK. [file peerj-07-6431-s003.xlsx]

## Sheet: 2017 grabs
Harbour	Site	Replicate	Total limpet (per 0.1 m2)	Total limpet (per m2)	Total oysters (per 0.1 m2)	Total oysters (per m2)
Portsmouth	1	1	0	0	0	0
Portsmouth	1	2	0	0	0	0
Portsmouth	1	3	0	0	0	0
Portsmouth	2	1	3	30	0	0
Portsmouth	2	2	0	0	0	0
Portsmouth	2	3	0	0	0	0
Portsmouth	3	1	0	0	0	0
Portsmouth	3	2	0	0	0	0
Portsmouth	3	3	0	0	0	0
Portsmouth	4	1	5	50	0	0
Portsmouth	4	2	7	70	0	0
Portsmouth	4	3	5	50	0	0
Portsmouth	5	1	0	0	0	0
Portsmouth	5	2	0	0	0	0
Portsmouth	5	3	9	90	0	0
Portsmouth	6	1	16	160	0	0
Portsmouth	6	2	8	80	0	0
Portsmouth	6	3	51	510	0	0
Portsmouth	7	1	0	0	0	0
Portsmouth	7	2	0	0	0	0
Portsmouth	7	3	0	0	0	0
Portsmouth	8	1	0	0	0	0
Portsmouth	8	2	31	310	0	0
Portsmouth	8	3	25	250	0	0
Portsmouth	9	1	11	110	0	0
Portsmouth	9	2	63	630	0	0
Portsmouth	9	3	15	150	0	0
Portsmouth	10	1	3	30	0	0
Portsmouth	10	2	21	210	0	0
Portsmouth	10	3	5	50	0	0
Portsmouth	11	1	4	40	0	0
Portsmouth	11	2	7	70	0	0
Portsmouth	11	3	0	0	0	0
Portsmouth	12	1	0	0	0	0
Portsmouth	12	2	0	0	0	0
Portsmouth	12	3	0	0	0	0
Portsmouth	13	1	0	0	0	0
Portsmouth	13	2	0	0	0	0
Portsmouth	13	3	0	0	0	0
Portsmouth	14	1	0	0	0	0
Portsmouth	14	2	0	0	0	0
Portsmouth	14	3	0	0	0	0
Portsmouth	15	1	127	1270	0	0
Portsmouth	15	2	15	150	0	0
Portsmouth	15	3	128	1280	0	0
Portsmouth	16	1	0	0	0	0
Portsmouth	16	2	62	620	0	0
Portsmouth	16	3	0	0	0	0
Portsmouth	17	1	0	0	0	0
Portsmouth	17	2	85	850	0	0
Portsmouth	17	3	14	140	0	0
Portsmouth	18	1	0	0	0	0
Portsmouth	18	2	0	0	0	0
Portsmouth	18	3	0	0	0	0
Portsmouth	19	1	0	0	0	0
Portsmouth	19	2	0	0	0	0
Portsmouth	19	3	27	270	0	0
Portsmouth	20	1	0	0	0	0
Portsmouth	20	2	0	0	0	0
Portsmouth	20	3	0	0	0	0
Portsmouth	21	1	0	0	0	0
Portsmouth	21	2	0	0	0	0
Portsmouth	21	3	0	0	0	0
Portsmouth	22	1	0	0	0	0
Portsmouth	22	2	0	0	0	0
Portsmouth	22	3	0	0	0	0
Portsmouth	23	1	0	0	0	0
Portsmouth	23	2	0	0	0	0
Portsmouth	23	3	0	0	0	0
Portsmouth	24	1	0	0	0	0
Portsmouth	24	2	0	0	0	0
Portsmouth	24	3	0	0	0	0
Portsmouth	25	1	0	0	0	0
Portsmouth	25	2	0	0	0	0
Portsmouth	25	3	0	0	0	0
Portsmouth	26	1	0	0	0	0
Portsmouth	26	2	0	0	0	0
Portsmouth	26	3	0	0	0	0
Portsmouth	27	1	0	0	0	0
Portsmouth	27	2	0	0	0	0
Portsmouth	27	3	0	0	0	0
Portsmouth	28	1	10	100	0	0
Portsmouth	28	2	0	0	0	0
Portsmouth	28	3	0	0	0	0
Portsmouth	29	1	0	0	0	0
Portsmouth	29	2	0	0	0	0
Portsmouth	29	3	0	0	0	0
Portsmouth	30	1	0	0	0	0
Portsmouth	30	2	0	0	0	0
Portsmouth	30	3	0	0	0	0
Langstone	1	1	0	0	0	0
Langstone	1	2	4	40	0	0
Langstone	1	3	0	0	0	0
Langstone	2	1	0	0	0	0
Langstone	2	2	4	40	0	0
Langstone	2	3	11	110	0	0
Langstone	3	1	132	1320	0	0
Langstone	3	2	0	0	0	0
Langstone	3	3	0	0	0	0
Langstone	4	1	158	1580	0	0
Langstone	4	2	74	740	0	0
Langstone	4	3	17	170	0	0
Langstone	5	1	4	40	0	0
Langstone	5	2	30	300	0	0
Langstone	5	3	12	120	0	0
Langstone	6	1	20	200	0	0
Langstone	6	2	16	160	0	0
Langstone	6	3	44	440	1	10
Langstone	7	1	10	100	0	0
Langstone	7	2	0	0	0	0
Langstone	7	3	44	440	0	0
Langstone	8	1	0	0	0	0
Langstone	8	2	0	0	0	0
Langstone	8	3	0	0	0	0
Langstone	9	1	0	0	0	0
Langstone	9	2	0	0	0	0
Langstone	9	3	0	0	0	0
Langstone	10	1	0	0	0	0
Langstone	10	2	0	0	0	0
Langstone	10	3	0	0	0	0
Langstone	11	1	9	90	0	0
Langstone	11	2	0	0	0	0
Langstone	11	3	0	0	0	0
Langstone	12	1	0	0	0	0
Langstone	12	2	1	10	0	0
Langstone	12	3	3	30	0	0
Langstone	13	1	0	0	0	0
Langstone	13	2	0	0	0	0
Langstone	13	3	0	0	0	0
Langstone	14	1	3	30	0	0
Langstone	14	2	0	0	0	0
Langstone	14	3	0	0	0	0
Langstone	15	1	0	0	0	0
Langstone	15	2	0	0	0	0
Langstone	15	3	15	150	0	0
Langstone	16	1	4	40	0	0
Langstone	16	2	0	0	0	0
Langstone	16	3	11	110	0	0
Langstone	17	1	1	10	0	0
Langstone	17	2	110	1100	0	0
Langstone	17	3	167	1670	0	0
Langstone	18	1	0	0	0	0
Langstone	18	2	36	360	0	0
Langstone	18	3	59	590	0	0
Langstone	19	1	28	280	0	0
Langstone	19	2	86	860	0	0
Langstone	19	3	8	80	0	0
Langstone	20	1	27	270	0	0
Langstone	20	2	5	50	0	0
Langstone	20	3	1	10	0	0
Langstone	21	1	19	190	0	0
Langstone	21	2	8	80	0	0
Langstone	21	3	9	90	0	0
Langstone	22	1	27	270	0	0
Langstone	22	2	12	120	0	0
Langstone	22	3	14	140	0	0
Langstone	23	1	0	0	0	0
Langstone	23	2	0	0	0	0
Langstone	23	3	7	70	0	0
Langstone	24	1	100	1000	0	0
Langstone	24	2	41	410	0	0
Langstone	24	3	0	0	0	0
Langstone	25	1	14	140	0	0
Langstone	25	2	0	0	0	0
Langstone	25	3	0	0	0	0
Langstone	26	1	41	410	0	0
Langstone	26	2	19	190	0	0
Langstone	26	3	22	220	0	0
Langstone	27	1	4	40	0	0
Langstone	27	2	40	400	0	0
Langstone	27	3	60	600	0	0
Langstone	28	1	13	130	0	0
Langstone	28	2	10	100	0	0
Langstone	28	3	0	0	0	0
Langstone	29	1	0	0	0	0
Langstone	29	2	0	0	0	0
Langstone	29	3	5	50	1	10
Langstone	30	1	1	10	0	0
Langstone	30	2	0	0	0	0
Langstone	30	3	1	10	0	0
Langstone	31	1	0	0	0	0
Langstone	31	2	0	0	0	0
Langstone	31	3	0	0	0	0
Chichester	1	1	0	0	0	0
Chichester	1	2	0	0	0	0
Chichester	1	3	0	0	0	0
Chichester	2	1	0	0	0	0
Chichester	2	2	0	0	0	0
Chichester	2	3	0	0	0	0
Chichester	3	1	0	0	0	0
Chichester	3	2	3	30	0	0
Chichester	3	3	0	0	0	0
Chichester	4	1	0	0	0	0
Chichester	4	2	0	0	0	0
Chichester	4	3	0	0	0	0
Chichester	5	1	0	0	0	0
Chichester	5	2	0	0	0	0
Chichester	5	3	0	0	0	0
Chichester	6	1	311	3110	0	0
Chichester	6	2	61	610	0	0
Chichester	6	3	22	220	0	0
Chichester	7	1	155	1550	0	0
Chichester	7	2	0	0	0	0
Chichester	7	3	2	20	0	0
Chichester	8	1	230	2300	0	0
Chichester	8	2	874	8740	0	0
Chichester	8	3	109	1090	0	0
Chichester	9	1	0	0	0	0
Chichester	9	2	0	0	0	0
Chichester	9	3	0	0	0	0
Chichester	10	1	0	0	0	0
Chichester	10	2	0	0	0	0
Chichester	10	3	0	0	0	0
Chichester	11	1	0	0	0	0
Chichester	11	2	0	0	0	0
Chichester	11	3	0	0	0	0
Chichester	12	1	0	0	0	0
Chichester	12	2	0	0	0	0
Chichester	12	3	0	0	0	0
Chichester	13	1	30	300	0	0
Chichester	13	2	23	230	0	0
Chichester	13	3	16	160	0	0
Chichester	14	1	165	1650	0	0
Chichester	14	2	0	0	0	0
Chichester	14	3	113	1130	0	0
Chichester	15	1	51	510	0	0
Chichester	15	2	86	860	0	0
Chichester	15	3	104	1040	0	0
Chichester	16	1	9	90	0	0
Chichester	16	2	16	160	0	0
Chichester	16	3	6	60	0	0
Chichester	17	1	0	0	0	0
Chichester	17	2	74	740	0	0
Chichester	17	3	15	150	0	0
Chichester	18	1	0	0	0	0
Chichester	18	2	0	0	0	0
Chichester	18	3	4	40	0	0
Chichester	19	1	0	0	0	0
Chichester	19	2	0	0	0	0
Chichester	19	3	0	0	0	0
Chichester	20	1	1	10	1	10
Chichester	20	2	0	0	0	0
Chichester	20	3	0	0	0	0
Chichester	21	1	43	430	0	0
Chichester	21	2	0	0	0	0
Chichester	21	3	6	60	0	0
Chichester	22	1	36	360	0	0
Chichester	22	2	0	0	0	0
Chichester	22	3	134	1340	0	0
Chichester	23	1	10	100	0	0
Chichester	23	2	23	230	0	0
Chichester	23	3	5	50	0	0
Chichester	24	1	0	0	0	0
Chichester	24	2	0	0	0	0
Chichester	24	3	0	0	0	0
Chichester	25	1	17	170	0	0
Chichester	25	2	8	80	0	0
Chichester	25	3	17	170	0	0
Chichester	26	1	0	0	0	0
Chichester	26	2	0	0	0	0
Chichester	26	3	0	0	0	0
Chichester	27	1	0	0	0	0
Chichester	27	2	0	0	0	0
Chichester	27	3	1	10	0	0
Chichester	28	1	0	0	0	0
Chichester	28	2	47	470	0	0
Chichester	28	3	11	110	0	0
Chichester	29	1	6	60	0	0
Chichester	29	2	0	0	0	0
Chichester	29	3	0	0	0	0
Chichester	30	1	0	0	0	0
Chichester	30	2	0	0	0	0
Chichester	30	3	0	0	0	0
Chichester	31	1	0	0	0	0
Chichester	31	2	2	20	0	0
Chichester	31	3	0	0	0	0
