# Supplementary material for: Active management is required to turn the tide for depleted Ostrea edulis stocks from the effects of overfishing, disease and invasive species
Source: PeerJ. 2019 Feb 28;7:e6431. doi: 10.7717/peerj.6431 (PMC6397756; doi:10.7717/peerj.6431)
Supplement: Supplemental Information 4 — 1998–2017 van veen grab densities from Chichester Harbour. [file peerj-07-6431-s004.xlsx]

## Sheet: Chichester 1998
Harbour	Site	Replicate	Limpets m2	Oysters m2
Chichester	2	1	48	0
Chichester	2	2	0	0
Chichester	2	3	0	0
Chichester	3	1	0	0
Chichester	3	2	0	0
Chichester	3	3	0	0
Chichester	4	1	0	0
Chichester	4	2	0	0
Chichester	4	3	0	0
Chichester	5	1	0	0
Chichester	5	2	0	0
Chichester	5	3	48	0
Chichester	6	1	576	60
Chichester	6	2	216	24
Chichester	6	3	1128	60
Chichester	7	1	0	0
Chichester	7	2	0	0
Chichester	7	3	0	0
Chichester	8	1	0	0
Chichester	8	2	0	0
Chichester	8	3	0	0
Chichester	9	1	0	0
Chichester	9	2	0	0
Chichester	9	3	0	0
Chichester	10	1	0	0
Chichester	10	2	0	0
Chichester	10	3	0	0
Chichester	11	1	0	0
Chichester	11	2	0	0
Chichester	11	3	0	0
Chichester	12	1	72	0
Chichester	12	2	156	0
Chichester	12	3	1104	12
Chichester	13	1	24	0
Chichester	13	2	24	12
Chichester	13	3	0	0
Chichester	14	1	492	36
Chichester	14	2	168	0
Chichester	14	3	564	12
Chichester	15	1	864	12
Chichester	15	2	1080	12
Chichester	15	3	1728	0
Chichester	16	1	0	0
Chichester	16	2	828	60
Chichester	16	3	1872	204
Chichester	17	1	696	24
Chichester	17	2	0	0
Chichester	17	3	0	0
Chichester	19	1	276	12
Chichester	19	2	0	0
Chichester	19	3	0	0
Chichester	20	1	24	12
Chichester	20	2	24	0
Chichester	20	3	12	0
Chichester	21	1	564	12
Chichester	21	2	552	12
Chichester	21	3	840	0
Chichester	22	1	480	24
Chichester	22	2	48	24
Chichester	22	3	0	0
Chichester	23	1	96	24
Chichester	23	2	0	0
Chichester	23	3	0	0
Chichester	24	1	708	36
Chichester	24	2	0	0
Chichester	24	3	0	0
Chichester	25	1	0	0
Chichester	25	2	0	0
Chichester	25	3	0	0
Chichester	26	1	0	0
Chichester	26	2	48	0
Chichester	26	3	72	0
Chichester	27	1	144	0
Chichester	27	2	12	0
Chichester	27	3	36	0
Chichester	28	1	36	0
Chichester	28	2	60	0
Chichester	28	3	36	0
Chichester	29	1	0	0
Chichester	29	2	0	0
Chichester	29	3	0	0
Chichester	30	1	12	0
Chichester	30	2	0	0
Chichester	30	3	0	12
Chichester	31	1	0	0
Chichester	31	2	0	0
Chichester	31	3	0	0

## Sheet: Chichester 2017
Harbour	Site	Replicate	Limpet m2	Oysters m2
Chichester	1	1	0	0
Chichester	1	2	0	0
Chichester	1	3	0	0
Chichester	2	1	0	0
Chichester	2	2	0	0
Chichester	2	3	0	0
Chichester	3	1	0	0
Chichester	3	2	30	0
Chichester	3	3	0	0
Chichester	4	1	0	0
Chichester	4	2	0	0
Chichester	4	3	0	0
Chichester	5	1	0	0
Chichester	5	2	0	0
Chichester	5	3	0	0
Chichester	6	1	3110	0
Chichester	6	2	610	0
Chichester	6	3	220	0
Chichester	7	1	1550	0
Chichester	7	2	0	0
Chichester	7	3	20	0
Chichester	8	1	2300	0
Chichester	8	2	8740	0
Chichester	8	3	1090	0
Chichester	9	1	0	0
Chichester	9	2	0	0
Chichester	9	3	0	0
Chichester	10	1	0	0
Chichester	10	2	0	0
Chichester	10	3	0	0
Chichester	11	1	0	0
Chichester	11	2	0	0
Chichester	11	3	0	0
Chichester	12	1	0	0
Chichester	12	2	0	0
Chichester	12	3	0	0
Chichester	13	1	300	0
Chichester	13	2	230	0
Chichester	13	3	160	0
Chichester	14	1	1650	0
Chichester	14	2	0	0
Chichester	14	3	1130	0
Chichester	15	1	510	0
Chichester	15	2	860	0
Chichester	15	3	1040	0
Chichester	16	1	90	0
Chichester	16	2	160	0
Chichester	16	3	60	0
Chichester	17	1	0	0
Chichester	17	2	740	0
Chichester	17	3	150	0
Chichester	18	1	0	0
Chichester	18	2	0	0
Chichester	18	3	40	0
Chichester	19	1	0	0
Chichester	19	2	0	0
Chichester	19	3	0	0
Chichester	20	1	10	10
Chichester	20	2	0	0
Chichester	20	3	0	0
Chichester	21	1	430	0
Chichester	21	2	0	0
Chichester	21	3	60	0
Chichester	22	1	360	0
Chichester	22	2	0	0
Chichester	22	3	1340	0
Chichester	23	1	100	0
Chichester	23	2	230	0
Chichester	23	3	50	0
Chichester	24	1	0	0
Chichester	24	2	0	0
Chichester	24	3	0	0
Chichester	25	1	170	0
Chichester	25	2	80	0
Chichester	25	3	170	0
Chichester	26	1	0	0
Chichester	26	2	0	0
Chichester	26	3	0	0
Chichester	27	1	0	0
Chichester	27	2	0	0
Chichester	27	3	10	0
Chichester	28	1	0	0
Chichester	28	2	470	0
Chichester	28	3	110	0
Chichester	29	1	60	0
Chichester	29	2	0	0
Chichester	29	3	0	0
Chichester	30	1	0	0
Chichester	30	2	0	0
Chichester	30	3	0	0
Chichester	31	1	0	0
Chichester	31	2	20	0
Chichester	31	3	0	0
			306.022	0.107527
